# Supplementary material for: Economic impacts of drought risks for water utilities through Severity-Duration-Frequency framework under climate change scenarios
Source: Copernicus journal article supplement (doi:10.5194/hess-2017-615), 2017-11-20
Supplement: Supplementary file 1 [file hess-2017-615-supplement.pdf]

1 **Supplementary material.**

2 **Section A.**

3 The performance criteria described below have been used in this study to test how well the  
4 calibrated model fits the observed data. These evaluation statistics have been selected based on  
5 recommendations in the literature (Moriassi et al., 2007; Muleta, 2012).

6

7 **Nash-Sutcliffe Efficiency (NSE)**

8 
$$NSE = 1 - \frac{\sum_{i=1}^N (S_i - O_i)^2}{\sum_{i=1}^N (S_i - O_{mean})^2}$$
 Equation 0-1.

9 where, “ $S_i$ ” is the model simulated output and “ $O_i$ ” observed hydrologic variable.

10

11 **Volumetric Efficiency (VE)**

12 
$$VE = 1 - \frac{\sum_{i=1}^N |S_i - O_i|}{\sum_{i=1}^N O_i}$$
 Equation 0-2.

13 **Ratio of Standard Deviation of Observations to RMS (RSR)**

14 
$$RSR = \frac{\sqrt{\sum_{i=1}^N (S_i - O_i)^2}}{\sqrt{\sum_{i=1}^N (S_i - O_{mean})^2}}$$
 Equation 0-3.

15 **Percent bias (PBIAS)**

16 
$$PBIAS = \frac{\sum_{i=1}^N (O_i - S_i)}{\sum_{i=1}^N O_i} \cdot 100$$
 Equation 0-4.

17 **Coefficient of Determination ( $R^2$ )**

18 
$$R^2 = \left( \frac{\sum_{i=1}^N [O_i - O_{mean}] \cdot [S_i - S_{mean}]}{\{\sum_{i=1}^N [O_i - O_{mean}]^2\}^{0.5} \cdot \{\sum_{i=1}^N [S_i - S_{mean}]^2\}^{0.5}} \right)^2$$
 Equation 0-5.

19

20 Cantareira basins performance criteria for Calibration and Validation periods. \*Cal. =  
21 Calibration period and Val. =Validation period, are shown in the Table A-1. The classification  
22 of colors are as follows: green for “very good” ( $NSE > 0.75$ ;  $PBIAS < \pm 10\%$ ;  $RSR < 0.50$ ),  
23 yellow for “good or satisfactory” ( $0.75 > NSE > 0.5$ ;  $\pm 10\% < PBIAS < \pm 25\%$ ;  $0.50 < RSR <$   
24  $0.60$ ), red for “unsatisfactory” ( $NSE < 0.5$ ;  $PBIAS > \pm 25\%$ ;  $RSR > 0.70$ ). Moreover, the

25 correlation coefficient ( $R^2$ ) and the VE criterion values close to 1.0 mean that the prediction  
 26 dispersion is equal to that of the observation.

27 **Table 0-1.** Performance criteria results on the Cantareira modeled basins.

| Watersheds | Area<br>(km <sup>2</sup> ) | VE   |      | NSE  |      | RSR  |      | PBIAS (%) |       | NSE <sub>Log</sub> |      | R <sup>2</sup> |      |
|------------|----------------------------|------|------|------|------|------|------|-----------|-------|--------------------|------|----------------|------|
|            |                            | Cal. | Val. | Cal. | Val. | Cal. | Val. | Cal.      | Val.  | Cal.               | Val. | Cal.           | Val. |
| Sub B-F28  | 269.0                      | 0.79 | 0.72 | 0.74 | 0.52 | 0.49 | 0.57 | 1.64      | 4.89  | 0.69               | 0.69 | 0.74           | 0.53 |
| Sub B-F23  | 508.4                      | 0.83 | 0.8  | 0.87 | 0.86 | 0.38 | 0.38 | 9.52      | 5.58  | 0.78               | 0.85 | 0.9            | 0.88 |
| Sub B-F25  | 179.5                      | 0.87 | 0.77 | 0.93 | 0.84 | 0.27 | 0.42 | 5.45      | -9.54 | 0.91               | 0.78 | 0.94           | 0.86 |
| Jaguari    | 67.8                       | 0.88 | 0.72 | 0.93 | 0.84 | 0.27 | 0.48 | -3.3      | -21.1 | 0.89               | 0.61 | 0.93           | 0.9  |

28

| Watersheds | Area<br>(km <sup>2</sup> ) | VE   |      | NSE  |      | RSR  |      | PBIAS (%) |       | NSE <sub>Log</sub> |      | R <sup>2</sup> |      |
|------------|----------------------------|------|------|------|------|------|------|-----------|-------|--------------------|------|----------------|------|
|            |                            | Cal. | Val. | Cal. | Val. | Cal. | Val. | Cal.      | Val.  | Cal.               | Val. | Cal.           | Val. |
| Jacareí    | 201.0                      | 0.8  | 0.75 | 0.71 | 0.87 | 0.44 | 0.42 | 2.08      | -1.54 | 0.49               | 0.75 | 0.79           | 0.87 |

29

| Watersheds | Area<br>(km <sup>2</sup> ) | VE   |      | NSE  |      | RSR  |      | PBIAS (%) |       | NSE <sub>Log</sub> |      | R <sup>2</sup> |      |
|------------|----------------------------|------|------|------|------|------|------|-----------|-------|--------------------|------|----------------|------|
|            |                            | Cal. | Val. | Cal. | Val. | Cal. | Val. | Cal.      | Val.  | Cal.               | Val. | Cal.           | Val. |
| Sub B-F24  | 172.8                      | 0.83 | 0.78 | 0.85 | 0.76 | 0.41 | 0.47 | -9.91     | 10.5  | 0.83               | 0.79 | 0.89           | 0.82 |
| Sub B-F30  | 119.7                      | 0.92 | 0.85 | 0.85 | 0.73 | 0.36 | 0.5  | 1.54      | 2.56  | 0.84               | 0.79 | 0.86           | 0.73 |
| Cachoeira  | 97.1                       | 0.71 | 0.70 | 0.78 | 0.81 | 0.5  | 0.53 | -20.3     | -13.5 | 0.58               | 0.53 | 0.87           | 0.85 |

30

| Watersheds | Area<br>(km <sup>2</sup> ) | VE   |      | NSE  |      | RSR  |      | PBIAS (%) |       | NSE <sub>Log</sub> |      | R <sup>2</sup> |      |
|------------|----------------------------|------|------|------|------|------|------|-----------|-------|--------------------|------|----------------|------|
|            |                            | Cal. | Val. | Cal. | Val. | Cal. | Val. | Cal.      | Val.  | Cal.               | Val. | Cal.           | Val. |
| Sub B-F34  | 135.5                      | 0.85 | 0.84 | 0.53 | 0.35 | 0.7  | 0.68 | 14.6      | 2.59  | 0.42               | 0.38 | 0.84           | 0.69 |
| Atibainha  | 176.2                      | 0.80 | 0.72 | 0.75 | 0.74 | 0.44 | 0.53 | 9.41      | -12.2 | 0.77               | 0.66 | 0.83           | 0.85 |

31

| Watersheds | Area<br>(km <sup>2</sup> ) | VE   |      | NSE  |      | RSR  |      | PBIAS (%) |      | NSE <sub>Log</sub> |      | R <sup>2</sup> |      |
|------------|----------------------------|------|------|------|------|------|------|-----------|------|--------------------|------|----------------|------|
|            |                            | Cal. | Val. | Cal. | Val. | Cal. | Val. | Val.      | Val. | Cal.               | Val. | Cal.           | Val. |
| P. Castro  | 333.7                      | 0.81 | 0.78 | 0.73 | 0.72 | 0.58 | 0.53 | -2.81     | 8.54 | 0.67               | 0.63 | 0.9            | 0.74 |

32

33

34

35

36

37

38

39

40 **Section B.**

41 Figure Fig. B-1 it is possible to observe that in the future there is no clear a trend in the averaged  
42 discharge, since in some periods the curve exhibits increase and in other periods decrease. In  
43 addition, the average discharge per time period showed higher values during the 2041-2070  
44 scenario, on the other hand, the average discharge per model showed higher values in the  
45 Eta/HadGEM model results, compared to the Eta/MIROC5 model.

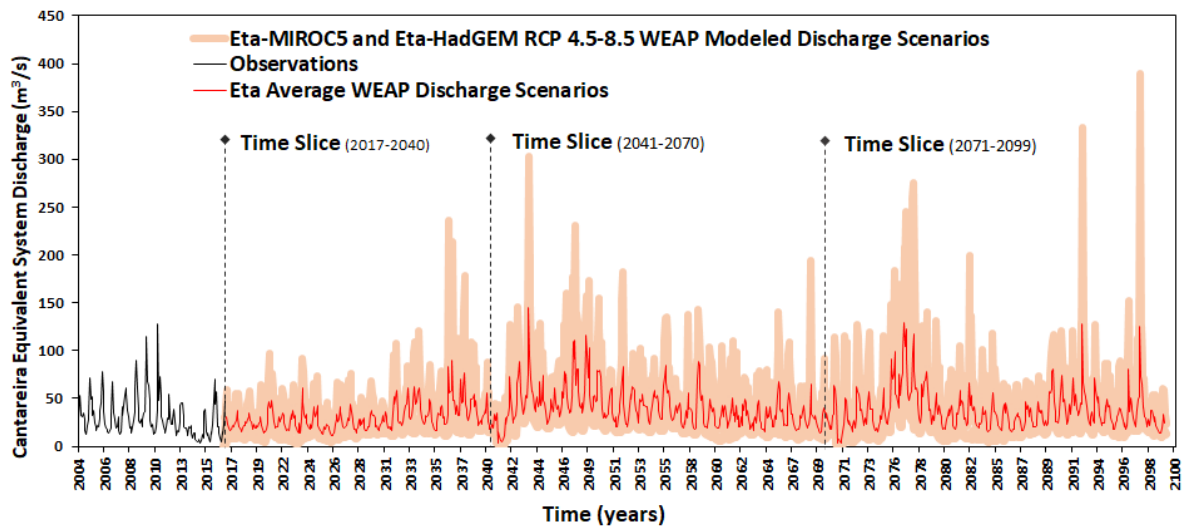

46  
47 **Figure 0-1.** Discharge projection scenarios modeled in WEAP, driven by RCM Eta-MIROC5 and Eta-HadGEM  
48 under RCP 4.5 - 8.5 scenarios.

49 **Section C.**

50 Fit diagnostic plot of Generalized Extreme Value (GEV) distribution.

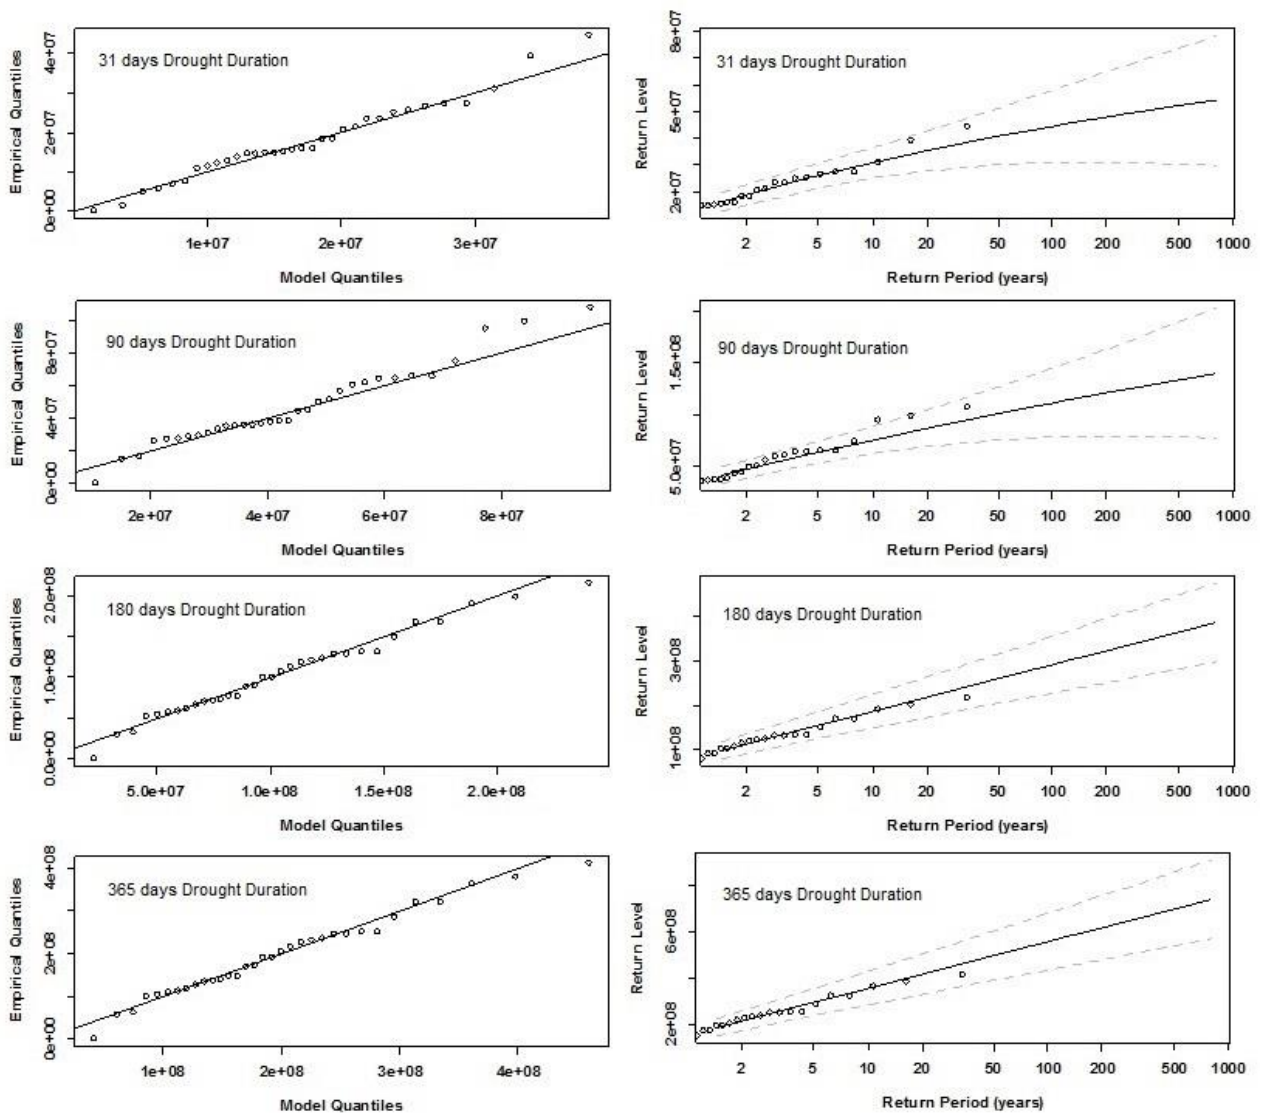

51

52 **Figure 0-1.** Diagnostic plots for stationary GEV model under historical Eta-HadGEM historical scenario and  
53 stationarity demand (monthly drought duration intervals): Left panel QQ-plot in [m<sup>3</sup>]; Right panel, return level  
54 [m<sup>3</sup>] vs return period plot.

55

56

57

58

59

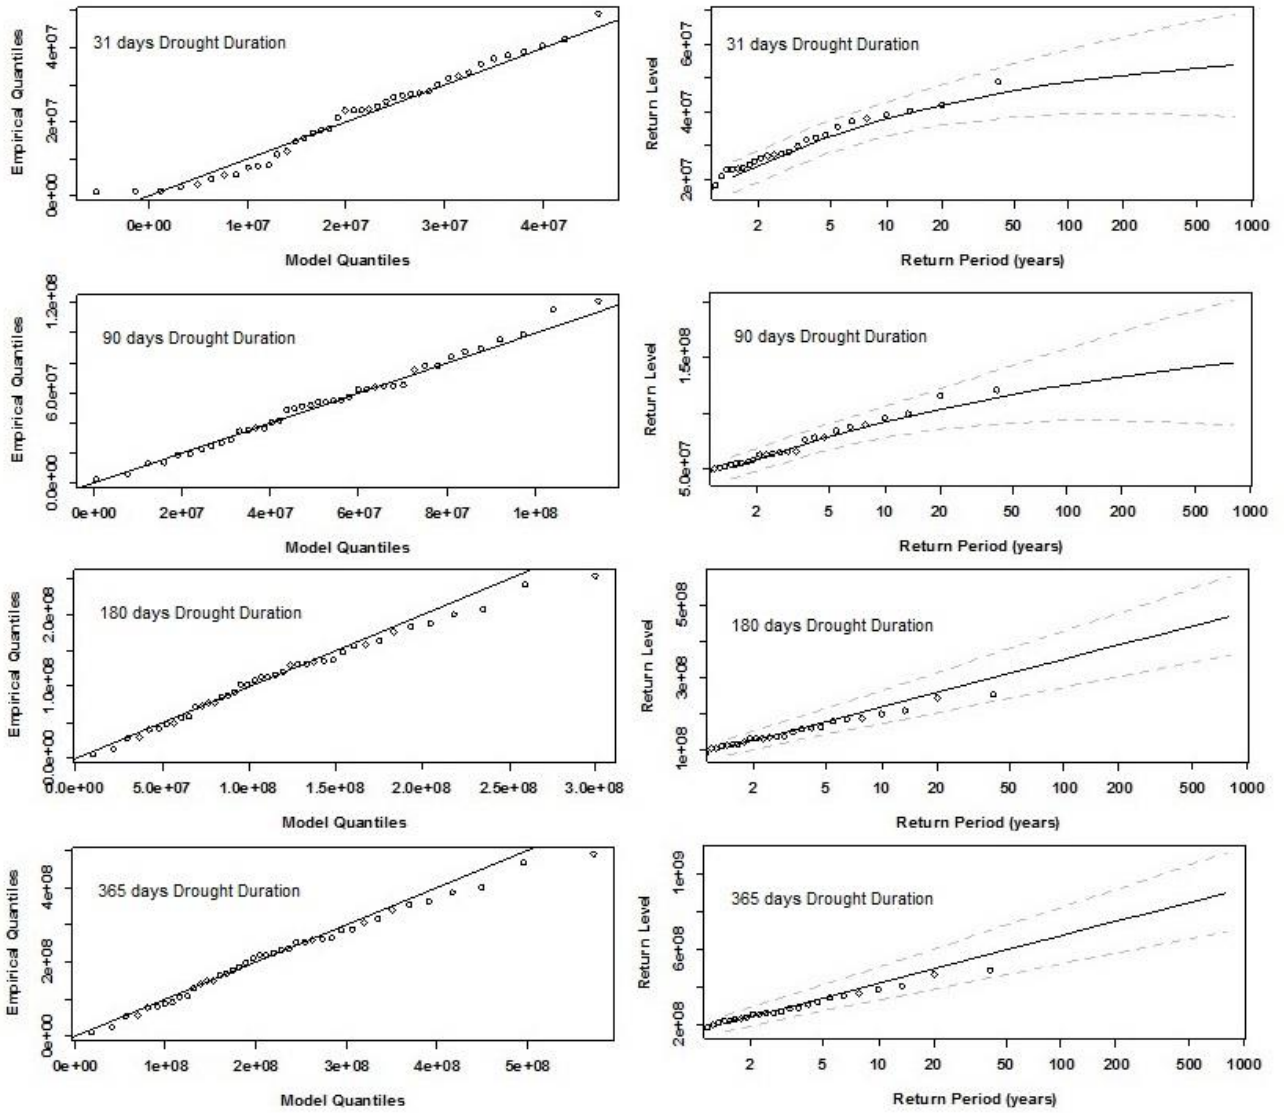

60  
 61 **Figure 0-2.** Diagnostic plots for stationary GEV model under historical Eta-HadGEM historical scenario and non-  
 62 stationarity demand (monthly drought duration intervals): Left panel QQ-plot [m<sup>3</sup>]; Right panel [m<sup>3</sup>], return level  
 63 vs return period plot.

64  
 65  
 66  
 67  
 68  
 69  
 70

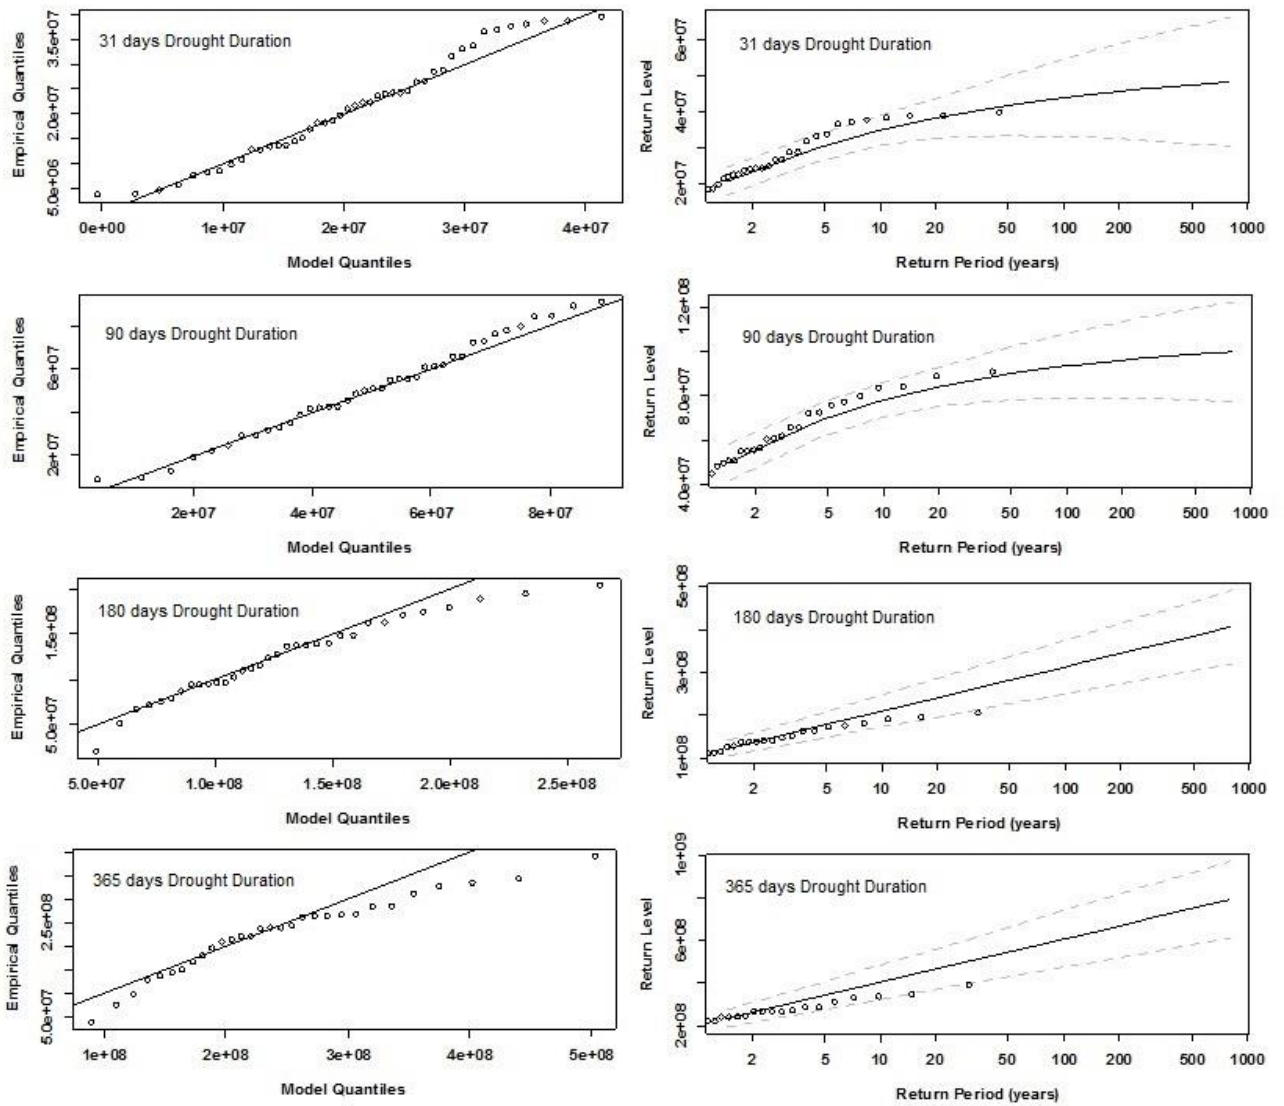

71  
 72 **Figure 0-3.** Diagnostic plots for stationary GEV model under historical Eta-MIROC5 historical scenario and  
 73 stationarity demand (monthly drought duration intervals): Left panel QQ-plot [m<sup>3</sup>]; Right panel, return level [m<sup>3</sup>]  
 74 vs return period plot.

75  
 76  
 77  
 78  
 79  
 80  
 81

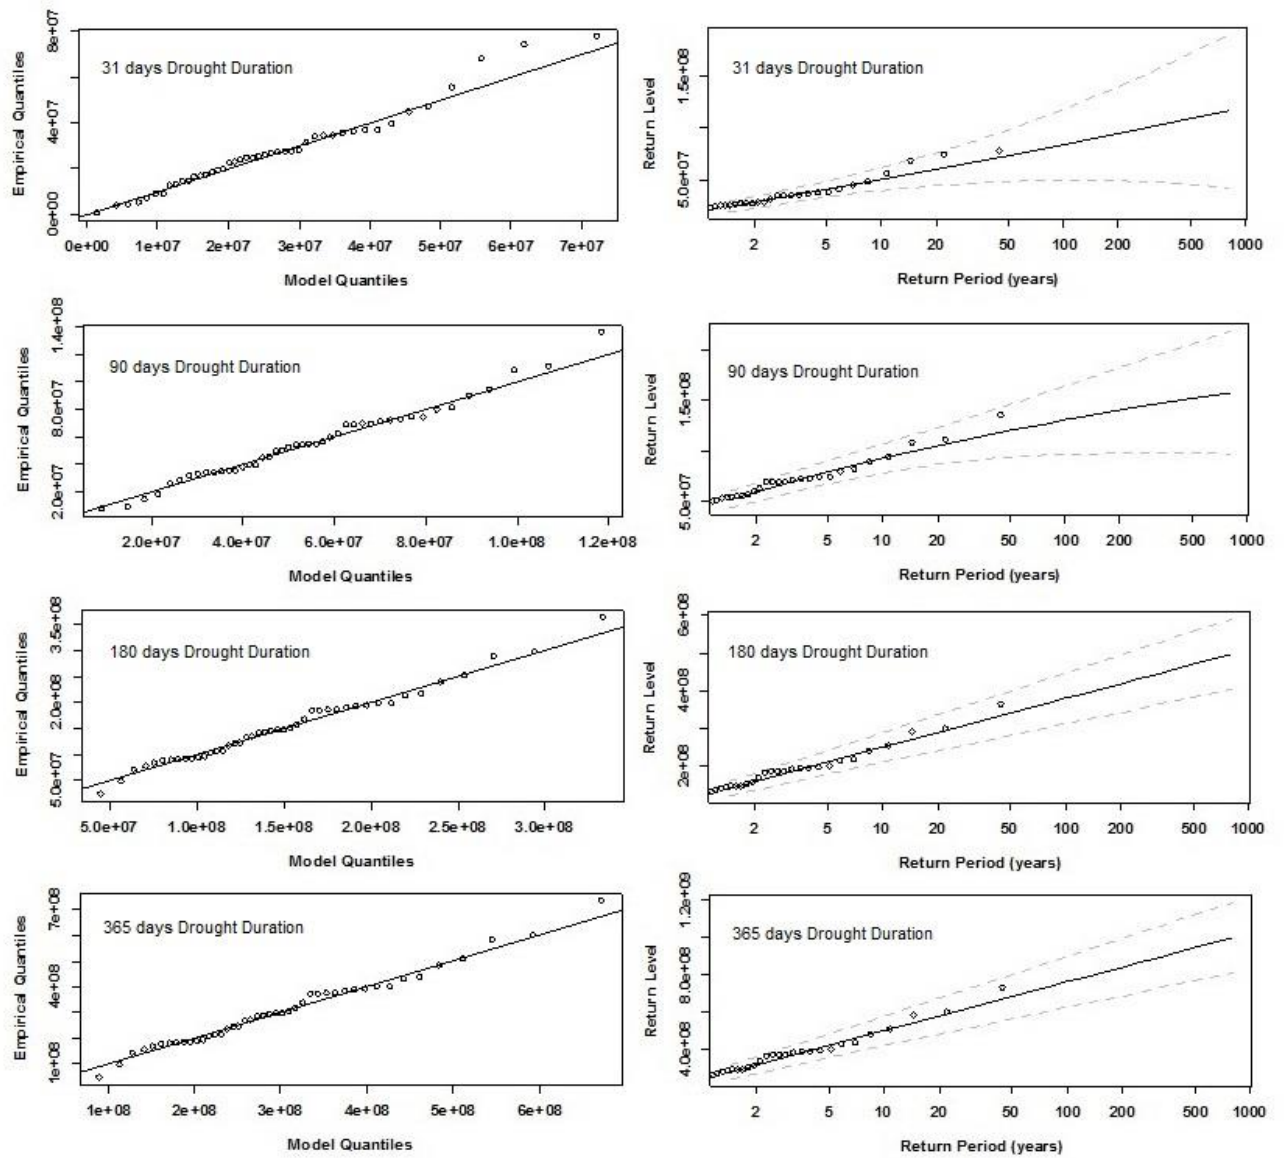

82  
 83 **Figure 0-4.** Diagnostic plots for stationary GEV model under historical Eta-MIROC5 historical scenario and non-  
 84 stationarity demand (monthly drought duration intervals): Left panel QQ-plot [m<sup>3</sup>]; Right panel, return level [m<sup>3</sup>]  
 85 vs return period plot.

86  
 87  
 88  
 89  
 90  
 91  
 92

93 **Section D.**

94

95 **Table 0-1.** Adjusted parameters GEV distribution Adjusted for SDF curve under Eta-MIROC5. Hist.-Stationary  
96 Demand scenario.

| Drought Duration | EtaMIROC5 Hist. Stationary Demand |                    |                 | Negative Log-Likelihood |
|------------------|-----------------------------------|--------------------|-----------------|-------------------------|
|                  | Location ( $\mu$ )                | Scale ( $\sigma$ ) | Shape ( $\xi$ ) |                         |
| <b>31 days</b>   | 1.69E+07                          | 1.06E+07           | -2.88E-01       | 773.50                  |
| <b>90 days</b>   | 4.25E+07                          | 2.29E+07           | -3.67E-01       | 714.02                  |
| <b>180 days</b>  | 1.06E+08                          | 4.48E+07           | 0.00E+00        | 629.90                  |
| <b>365 days</b>  | 2.00E+08                          | 8.86E+07           | 0.00E+00        | 592.68                  |

97

98 **Table 0-2.** Adjusted parameters GEV distribution Adjusted for SDF curve under Eta-MIROC5. Hist.-Non-  
99 Stationary Demand scenario.

| Drought Duration | EtaMIROC5 Hist. Non-Stationary Demand |                    |                 | Negative Log-Likelihood |
|------------------|---------------------------------------|--------------------|-----------------|-------------------------|
|                  | Location ( $\mu$ )                    | Scale ( $\sigma$ ) | Shape ( $\xi$ ) |                         |
| <b>31 days</b>   | 1.90E+07                              | 1.33E+07           | 2.74E-02        | 791.25                  |
| <b>90 days</b>   | 4.36E+07                              | 2.40E+07           | -1.07E-01       | 813.71                  |
| <b>180 days</b>  | 1.20E+08                              | 5.62E+07           | 0.00E+00        | 853.50                  |
| <b>365 days</b>  | 2.42E+08                              | 1.13E+08           | 0.00E+00        | 884.40                  |

100

101 **Table 0-3.** Adjusted parameters GEV distribution Adjusted for SDF curve under Eta-HadGEM. Hist.-Stationary  
102 Demand scenario.

| Drought Duration | EtaHADGEM-ES Hist. Stationary Demand |                    |                 | Negative Log-Likelihood |
|------------------|--------------------------------------|--------------------|-----------------|-------------------------|
|                  | Location ( $\mu$ )                   | Scale ( $\sigma$ ) | Shape ( $\xi$ ) |                         |
| <b>31 days</b>   | 1.33E+07                             | 8.64E+06           | -1.10E-01       | 576.79                  |
| <b>90 days</b>   | 3.53E+07                             | 1.88E+07           | -5.54E-02       | 605.61                  |
| <b>180 days</b>  | 8.00E+07                             | 4.56E+07           | 0.00E+00        | 631.75                  |
| <b>365 days</b>  | 1.53E+08                             | 8.73E+07           | 0.00E+00        | 653.16                  |

103

104 **Table 0-4.** Adjusted parameters GEV distribution Adjusted for SDF curve under Eta-HadGEM. Hist.-Non-  
105 Stationary Demand scenario.

| Drought Duration | EtaHADGEM-ES Hist. Non-Stationary Demand |                    |                 | Negative Log-Likelihood |
|------------------|------------------------------------------|--------------------|-----------------|-------------------------|
|                  | Location ( $\mu$ )                       | Scale ( $\sigma$ ) | Shape ( $\xi$ ) |                         |
| <b>31 days</b>   | 1.62E+07                                 | 1.32E+07           | -3.04E-01       | 728.85                  |
| <b>90 days</b>   | 4.13E+07                                 | 2.71E+07           | -1.84E-01       | 761.14                  |
| <b>180 days</b>  | 8.63E+07                                 | 5.73E+07           | 0.00E+00        | 792.70                  |
| <b>365 days</b>  | 1.65E+08                                 | 1.10E+08           | 0.00E+00        | 819.49                  |

106

107

108



109 **Section E.**

110 Histogram for the SABESP tariff adjustment data series during the period 2000-2016.

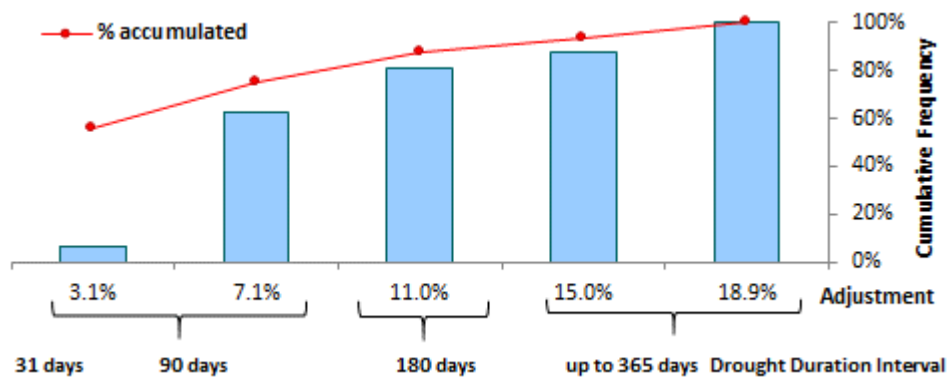

111

112 **Figure 0-1.** Relationship assumptions between Drought duration intervals and water tariff adjustments. Series  
113 structure: 16 data in total; first interval 1 frequency, second interval 9 frequencies, third interval 3 frequencies,  
114 fourth interval 1 frequency and fifth interval 2 frequencies; average 7.85%, minimum 3.14% and maximum 18.9%.
