# Supplementary material for: Economic impacts of drought risks for water utilities through Severity-Duration-Frequency framework under climate change scenarios
Source: Copernicus journal article supplement (doi:10.5194/hess-2017-615), 2017-11-20
Supplement: Supplementary file [file hess-2017-615-AC3-supplement.pdf]

# Economic impacts of drought risks for water utilities through Severity-Duration-Frequency assessment under climate change scenarios

Diego A. Guzman<sup>1</sup>, Guilherme S. Mohor<sup>2</sup>, Denise Taffarello<sup>3</sup> and Eduardo M. Mendiondo<sup>3</sup>

<sup>One</sup> Department of Civil Engineering, Pontificia Bolivariana University, Bucaramanga, STD, 681007, Colombia

<sup>Two</sup> Institute of Earth and Environmental Science, University of Potsdam, Karl-Liebknecht-Str. 24–25, 14476 Potsdam, Germany

<sup>3</sup> Department of Hydraulics and Sanitation - Sao Carlos School of Engineering, University of Sao Paulo - Sao Carlos, SP, 13566-590, Brazil

Correspondence to: Diego A. Guzman (daga2040@hotmail.com)

## Abstract

Climate change and increasing water demands show the need for implementing planning strategies for financial sustainability of sectors, which are highly dependent on water resources, such as water utility companies. The financial vulnerability of these companies increases considering water supply growth and low availability scenarios, resulting in less profits or economic bankrupt. Generally, methods to estimate financial impacts caused by drought are not as numerous and clear as those for floods due to the complex characteristics of the phenomenon. Therefore, we propose a new assessment to estimate the business interruption cost considering the uncertainties in the climate and urban demand projections in the medium and long term. The methodology integrates the semi-distributed hydrological simulation procedures linked to the Water Evaluation and Planning system (WEAP) under radiative climate forcing scenarios RCP 4.5 and 8.5 from the regional climate model outputs Eta-INPE/MIROC5 and HadGEM-ES (RCM). The approach continues with the hydrological drought assessment "Severity-Duration-Frequency" (SDF), based on stationary and non-stationary water demand assumptions to establish the method's threshold levels. Likewise, the methodology defines a water tariff price delimited by the drought duration and the system's robustness analysis to determine revenue loss scenarios in the water utility, through planning periods: 2007-2040, 2041-2070, and 2071-2099. As a case study, the approach is applied to the Cantareira Water Supply System in the São Paulo Metropolitan Region (SPMR), the main water supply source for about 11 million people. The results show that the water-cost outputs based on Eta-MIROC5 present higher revenue losses in the company than those based on HadGEM-ES. Meanwhile, the relationship between RCP scenarios 4.5 and 8.5 showed lower variability compared to the analyzed climate-with-water demand scenarios. However, the Non-stationary demand (NSD)

35 trend imposed larger differences in the drought resilience financial gap, suggesting that the  
36 demand-related uncertainty would be far greater than that associated with climate sensitivity.

37 **Key Words:** Climate change, Severity-Duration-Frequency assessment, Water utility revenue  
38 losses, Hydrological droughts

### 39 1. Introduction

40 Climate change, population growth and uncontrolled urban/industrial development make  
41 society more dependent on water (Montanari et al., 2013). The complex interaction between  
42 meteorological, terrestrial and socio-economic water distribution schemes are the main factors  
43 that define droughts (Lloyd-hughes, 2013; Van Loon et al., 2016b, 2016a; Wada et al., 2013).  
44 Therefore, in order to address a potential drought scenario in the future with demand as a  
45 determinant anthropogenic factor, society is required to rethink the way forward, mainly to  
46 reduce its vulnerability by regulating its demand (Falkenmark and Lannerstad, 2004;  
47 Kunreuther et al., 2013; Wanders and Wada, 2015).

48 Apparently, droughts may not be as apparent as floods, but have proven to be one of the most  
49 complex risks due to their slow development, strong and long lasting impacts as well as broad  
50 geographic coverage (Bressers and Bressers, 2016; Frick et al., 1990a; Smakhtin and Schipper,  
51 2008; Van Lanen et al., 2013). Furthermore, various studies have shown that more severe and  
52 prolonged droughts are expected for the future, leading to greater economic consequences,  
53 environmental degradation and loss of human lives (Asadieh and Krakauer, 2017; Balbus,  
54 2017; Berman et al., 2013; Freire-González et al., 2017; Prudhomme et al., 2014; Shi et al.,  
55 2015; Stahl et al., 2016; Touma et al., 2015). Therefore, it is essential to create adequate risk  
56 perception, aiming to reduce the risks, mitigate the impacts and build a more resilient-drought  
57 community (Bachmair et al., 2016; Mishra and Singh, 2010; Nam et al., 2015).

58 The most visible impacts on the urban water supply are strongly related to hydrological  
59 droughts and not directly to meteorological droughts (Bachmair et al., 2016; Van Lanen et al.,  
60 2016). A hydrological drought is defined as a negative anomaly in surface and subsurface water  
61 levels (Mishra and Singh, 2010; Van Loon, 2015; Wanders et al., 2017). These negative  
62 anomalies on the surface, related to an excessive level of water demand can cause water systems  
63 to collapse (Mehran et al., 2015; Van Loon et al., 2016b; Wanders and Wada, 2015). Therefore,  
64 in this study we address hydrological droughts as the main driver of business interruption in the  
65 water utility company, specifically when urban water demand exceeds the supply system offer  
66 (Bressers and Bressers, 2016; Frick et al., 1990a, 1990b).

67 The definitions of drought losses (or drought costs) are not as clear as those regarding floods or  
68 methods for estimating drought costs, although diverse, not as numerous as floods. (Freire-  
69 González et al., 2017; Logar and van den Bergh, 2013; Meyer et al., 2013). In a comprehensive  
70 review by Logar and van der Bergh (2012), the authors suggest a division of drought costs as  
71 direct, indirect and non-market costs. Furthermore, Meyer et al. (2013) suggest extra categories,  
72 differentiating Business interruption costs as primary tangible costs, although not configured as  
73 “due to direct physical contact”. Despite a diversified range of methods presented by Meyer et  
74 al. (2013) and Logar and van der Bergh (2012), several are either: for non-tangible or indirect  
75 methods, specific for the agricultural sector or economy wide oriented (i.e. fit to a broader scale  
76 application) which in our case would likely incur in less precise results. Regarding the  
77 allocation of water companies by reduced water availability, several approaches seem to be  
78 adequate, such as market valuation techniques or ex-post evaluations, that is, comparing  
79 changes in GDP or changes in price between affected and unaffected years

80 In Brazil, from 2013 to 2015, the population of the Sao Paulo Metropolitan Region (SPMR)  
81 experienced the most acute water crisis in its history (Coutinho et al., 2015; Nobre and  
82 Marengo, 2016; Taffarello et al., 2016). According to the Federation of Industries of the State  
83 of Sao Paulo (FIESP), it was estimated that 60,000 households, business and industrial sectors,  
84 which represent almost 60% of the state's industrial GDP, were affected by a lack of water  
85 (Marengo et al., 2015). Likewise, during 2014 and 2015, the Sao Paulo State Water Utility  
86 Company (SABESP) recorded an average annual liquid net income reduction of approximately  
87 63% compared to 2013, leading to a major financial crisis in the company (GESP, 2016;  
88 SABESP, 2017a). To analyze the water utility drought impacts, several control strategies are  
89 usually implemented as price-based policies that seek to change the user's consumption pattern  
90 based on economic penalties or incentives (Buurman et al., 2017; Millerd, 1984; Rossi and  
91 Cancelliere, 2013). However, the implementation of these strategies entails a great complexity  
92 in their planning and high risks of economic impacts for the water company (SABESP, 2015;  
93 Watts et al., 2012).

94 To deal with global change, understanding the interplay between multiple drivers of risks and  
95 socioeconomic development is increasingly required to inform effective actions to manage new  
96 drought risks and pursue sustainable development. However, as long as there are no systematic  
97 and detailed studies on the assessment drought impacts on the regional economy, shaping  
98 financial planning policies is a complex and uncertain task that must be reinforced. Therefore,  
99 based on the drought Severity-Duration-Frequency characterization, we explore the water

100 utility company business interruption cost assessment by integrating an analysis framework  
101 driven by climate change, water-demand scenarios and the supply system robustness. This  
102 paper describes an academic exercise to manage drought financial planning, running the Eta-  
103 INPE (RCM) outputs, through a semi-distributed hydrological model of the water supply  
104 system developed using WEAP.

105 The sections of this article outline interconnected methods and criteria, explained as follows.  
106 In Section 2, the text describes the study area and water crisis contextualization. Section 3  
107 outlines the methodological approach starting with the hydrological modeling, characterization  
108 of the droughts using the threshold level method, the formulation of the SDF curves of the  
109 system and subsequently, the climatic, hydrological and economic aspects of the methodology.  
110 In Section 4, the results and discussions are shown as financial drought planning scenarios.  
111 Finally, in Section 5, the conclusions and recommendations are presented regarding the  
112 proposed approach.

## 113 **2. Study area and water crisis contextualization.**

114 The Cantareira Water Supply System, hereafter referred to as the Cantareira System, is located  
115 in South-East Brazil between the states of Sao Paulo and Minas Gerais. The rainy season in the  
116 Cantareira System generally begins at the end of September and ends in March. In this period,  
117 on average 72% of the rainfall in the region is accumulated (Marengo et al., 2015). In  
118 hydrological terms, 2265 km<sup>2</sup> of drainage area into the system historically generates an annual  
119 mean tributary discharge of 38.74 m<sup>3</sup>/s. Structurally, the system consists of the damming and  
120 interconnection of five basins with a useful total storage volume of 988.8 hm<sup>3</sup>, arranged to  
121 transfer water from the Piracicaba River Basin to the Upper Tietê Basin (Fig. 1). As a result,  
122 the system had been configured to supply water to about 11 million people in the SPMR before  
123 the last acute water crisis in 2013-15 (De Andrade, 2016; Marengo et al., 2015; Nobre et al.,  
124 2016; Nobre and Marengo, 2016; PCJ/Comitês, 2016, 2006).

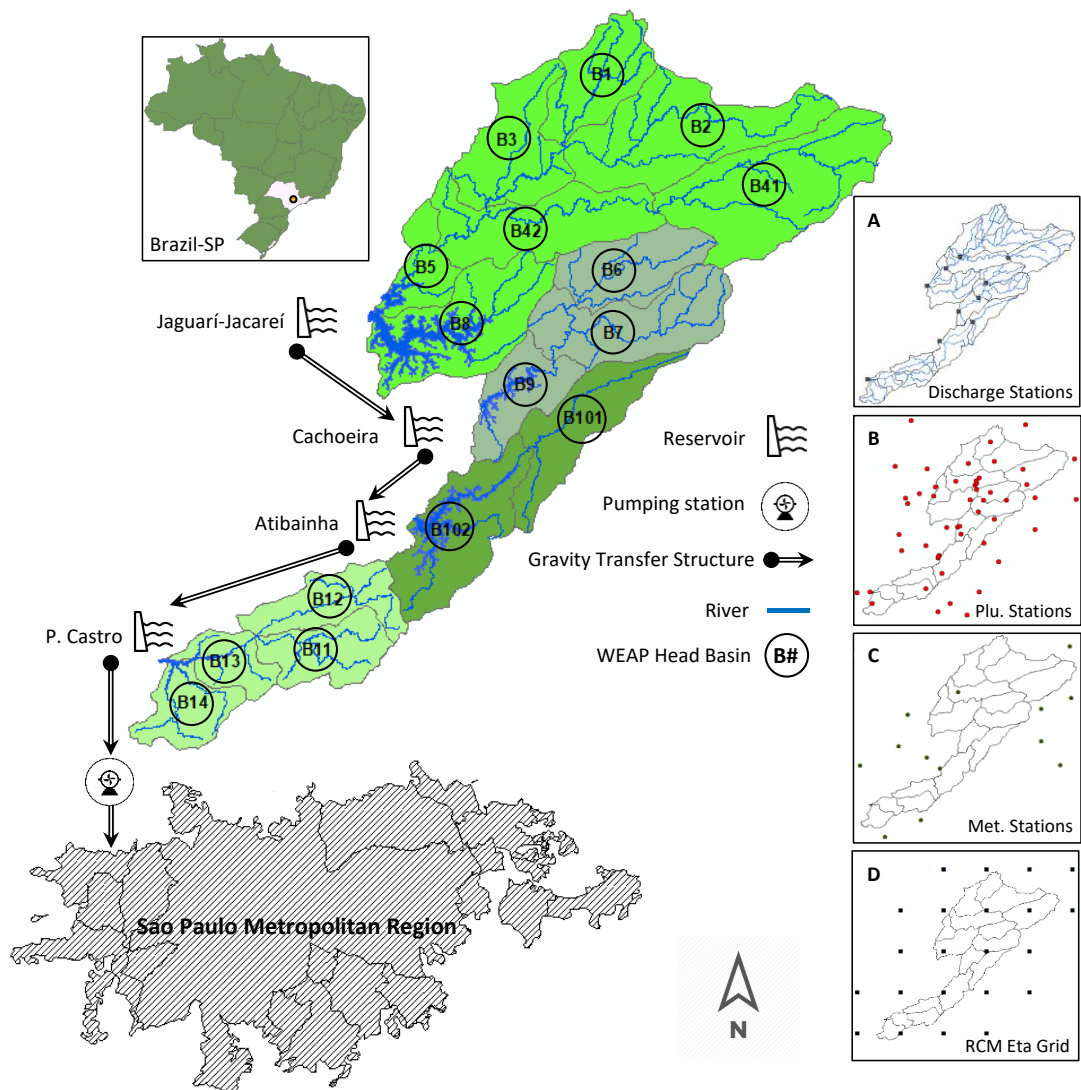

125  
 126 **Figure 1.** System structure composition and catchment areas “Cantareira System”: Jaguari-Jacareí, Cachoeira,  
 127 Atibainha and Paiva Castro watersheds. Panel A: Discharge gauge stations; Panel B: rainfall gauge stations; Panel  
 128 C: Meteorological gauge stations and Panel D: Centroid of the Eta-INPE grid.

129 Previously in the SPMR, some severe water shortages were recorded. The first one was during  
 130 1953-1954, then from 1962-1963 (Nobre et al., 2016), which apparently motivated the  
 131 construction of the Cantareira System and the latest one was from 2000-2001 (Cavalcanti and  
 132 Kousky, 2001). Thus, the system, designed to supply the increasing demand for water in the  
 133 SPMR, began its partial operation in 1974 and its construction was completed in 1981 with a  
 134 30-year permit to transfer up to 35 m<sup>3</sup>/s according to a periodic technical assessment (Mohor  
 135 and Mendiondo, 2017). The Cantareira System is currently administered by SABESP, which  
 136 mainly operates the water network in the SPRM, and the Government of Sao Paulo state is its  
 137 main shareholder.

138 However, various studies have identified changes in rainfall trends and temperature extremes,  
139 showing an increase in the intensity and frequency of days with heavy rainfall and longer  
140 duration of hot dry periods between rainfall events in South America and southeast Brazil (Chou  
141 et al., 2014b; Dufek and Ambrizzi, 2008; Haylock et al., 2006; J. A. Marengo et al., 2009; Jose  
142 A. Marengo et al., 2009b, 2009a; Nobre et al., 2011; Zuffo, 2015). Although historically, the  
143 SPRM study area is not affected by droughts of the same order of Northeast Brazil, the SPRM  
144 is progressively becoming vulnerable to water shortages. Therefore, during the recent period of  
145 the acute crisis 2013-2015, SABESP undertook reactive measures to control the consumption  
146 in the SPMR, such as (Marengo et al., 2015): programmed water cut-offs; bonuses and penalties  
147 to reduce and increase consumption, respectively; extraordinary increases of water tariff prices;  
148 network pressure reduction; water use from the reservoirs' dead volume; social awareness  
149 campaigns to inform people about shortages; and water distributed by tankers in the most  
150 critical areas of the city to provide the Basic Water Requirement (BWR) for human needs.  
151 Nevertheless, according to SABESP, there is a slow system recovery, which enables the  
152 reestablishment of pre-crisis supply levels (SABESP, 2018a).

153

### 154 **3. Methodology**

155 The methodology was structured in three modules that are summarized in Figure 2. In the first  
156 module, the hydrological simulation was approached by the Water Evaluation and Planning  
157 tool (WEAP) (Yates et al., 2005a). The model was calibrated and validated based on the  
158 available historical hydrometeorological information (2004-2015) for the study area. Then,  
159 from the calibrated hydrological model and the RCM Eta-INPE historical period datasets, the  
160 base discharge scenarios were estimated.

161 In the second module, following the Threshold Level Method (TLM), the "threshold" had to be  
162 defined according to stationary and non-stationary assumptions of water demand in the SPMR.  
163 Afterwards by analyzing the duration series and extreme deficits through GEV (Generalized  
164 Extreme Value) distribution, the Severity-Duration-Frequency curves (SDF) were developed to  
165 calculate the intra-annual deficit (J. H. Sung and Chung, 2014). To complete the second  
166 module, the average water price and the Cantareira system robustness analysis is defined per  
167 each cubic meter of deficit (Mens et al., 2015), as a function of the supply warranty time during  
168 the hydrological drought events, to configure the baseline analysis scenarios.

169 The final module evaluates the Water Utility Company economic profit losses through the  
170 baselines scenarios, under the hydrological scenarios developed with the model WEAP, driven

171 by the Eta-INPE RCPs scenarios (2007-2040, 2041-2070, 2071-2099), previously processed by  
 172 the TLM approach. It should be clarified that, for the analysis under the non-stationary  
 173 assumption, the growth of water consumption is represented in each projection time step, that  
 174 is, 2005-2040 corresponds to 31 m<sup>3</sup>/s, 2041-2070 corresponds to 38 m<sup>3</sup>/s and 2071-2099  
 175 corresponds to 43m<sup>3</sup>/s.

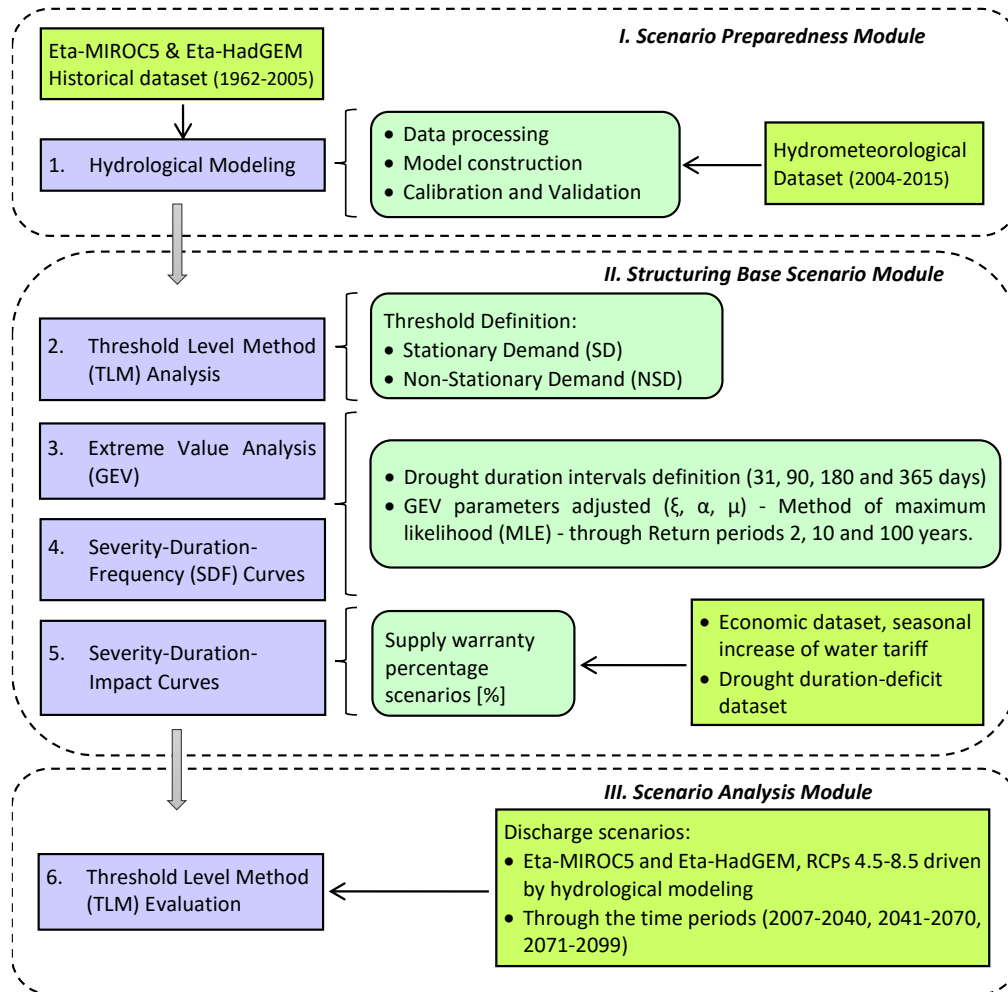

176  
 177 **Figure 2.** Methodology flowchart and main inputs.

178 The results, presented as water utility company revenue losses were developed from a set of  
 179 potential scenarios involving climate uncertainty, human triggering factors and the prediction  
 180 under extreme theory (Baumgärtner and Strunz, 2014; Wanders and Wada, 2015). The  
 181 methodology sought to provide a planning water-security support analysis in areas highly  
 182 dependent on surface water resources.

183 **3.1. Hydrological projections**

184 Currently the RCM Eta-INPE (Brazilian National Institute for Space Research) plays an  
 185 important role in providing information for local impact studies in Brazil and other areas in

186 South America (Chou et al., 2014b). In order to assess the uncertainties of climate change  
187 impacts, the simulation results of the Eta-INPE model were used in this paper. The model is  
188 nested within the GCMs MIROC5 and HADGEM2-ES, forced by two greenhouse gas  
189 concentration scenarios (RCPs) 8.5 and 4.5 [ $\text{W/m}^2$ ] used in AR5 (IPCC 5th Assessment  
190 Report); with a horizontal grid size resolution of 20 km x 20 km and up to 38 vertical levels  
191 through 30 years of time slices (periods) distributed as follows: 1961-2005 (as the baseline  
192 period), 2007-2040, 2041-2070 and 2071-2099 (Chou et al., 2014a, 2014b; Prudhomme et al.,  
193 2014). The climate projections of the Eta-INPE model were used to drive the WEAP Rainfall  
194 Runoff Model-soil moisture method (World Bank, 2017; Yates et al., 2005a). The WEAP, is  
195 an integrated water resource planning tool used to develop and assess scenarios that explore  
196 physical changes (natural or anthropogenic) and has been widely used in various basins  
197 throughout the world (Angarita et al., 2018; Bhave et al., 2014; Esteve et al., 2015; Foster and  
198 Brozovic, 2018; Groves et al., 2008; Howells et al., 2013; Hund et al., 2018; Mousavi and  
199 Anzab, 2017; Psomas et al., 2016; Purkey et al., 2008; Vicuña et al., 2011; Vicuna and Dracup,  
200 2007; Yates et al., 2005b). Climate-driven models, such as WEAP provide dynamic tools by  
201 incorporating hydroclimatological variables to analyze, in this case, a one-dimensional, quasi  
202 physical water balance model, which depicts the semi-distributed hydrologic response through  
203 the surface runoff, infiltration, evapotranspiration (Penman-Monteith equation), interflow,  
204 percolation and base flow processes (Forni et al., 2016).

205 The hydrological model comprises 16 sub-basins with a spatial resolution ranging from 67 to  
206 272  $\text{km}^2$  (see Figure 1), which defines the natural discharge produced by the Cantareira System.  
207 The observed hydrologic data (discharge and rainfall) were taken from HIDROWEB (the  
208 National Water Agency database [ANA]), SABESP and the São Paulo state Water and  
209 Electricity Department [DAEE]. A network of 52 rain gauge stations and 11 discharge gauge  
210 stations were configured, with inputs and outputs by a monthly time-step. On the other hand,  
211 the meteorological data from 14 gauging stations (temperature, relative humidity, wind speed  
212 and cloudiness fraction) were taken from the National Institute of Meteorology and Center for  
213 Weather Forecasting and Climate Research (CPTEC) databases (see Figure 1: panels A, B, C  
214 and D). For the basin characterization, we adopted the soil map from (De Oliveira et al., 1999)  
215 (1:500,000) and the land use map of 2010 from (Molin et al., 2015) (1:60,000).

216 The hydrological model was calibrated using a mixed calibration process. A first approximation  
217 of the calibration parameters was made by the Model-Independent Parameter Estimation &  
218 Uncertainty Analysis software (PEST), automatic calibration tool in WEAP (Doherty and



219 Skahill, 2006; Seong et al., 2015; Skahill et al., 2009; Stockholm Environment Institute (SEI),  
220 2016), and then the calibration parameters were refined using a manual adjustment technique.  
221 In the modeling process, a two-year warm-up period from 2004 to 2005 was established, for  
222 the calibration period from January 2006 to December 2010 and from January 2011 to August  
223 2015 as the validation period. Although more extensive periods of calibration and validation  
224 are suggested to better represent hydrological dynamics (Gibbs et al., 2018), the absence of  
225 observed data restricted the extension of assessment periods. During this process, the following  
226 variables were calibrated: Kc (Crop Coefficient), SWC (Soil Water Capacity), DWC (Deep  
227 Water Capacity), RZC (Root Zone Conductivity), DC (Deep Conductivity) and PFD  
228 (Preferential Flow Direction). The objective functions to measure model performance, widely  
229 used in hydrologic applications, were the Volumetric Error Percent Bias (PBIAS), Standard  
230 Deviation Ratio (SDR), Nash-Sutcliffe Efficiency (NSE), NSE of the logarithmic of discharges  
231 ( $NSE_{Log}$ ) which is more sensitive to low-flows, Coefficient of determination ( $R^2$ ) and  
232 Volumetric Efficiency (VE), where the joint maximization of the  $NSE_{Log}$  and PBIAS criteria  
233 was the objective function to measure model performance (Muleta, 2012).

234 The WEAP model was calibrated based on eleven discharge gauge stations (see Figure 1, panel  
235 A) from the ANA-HIDROWEB dataset ([www.ana.gov.br](http://www.ana.gov.br)), four of these located at the reservoir  
236 entrance of each sub-system (Jaguari-Jacareí, Cachoeira, Atibainha and Paiva Castro).  
237 Cantareira's reservoirs (sub-systems) were set up as a single Equivalent System (ES), where  
238 the specific water demands are considered (ANA and DAEE, 2004; PCJ/Comitês, 2006). This  
239 ES can be expressed as follows:

$$240 \quad ES_{Cantareira} = \sum_i^n QN_i - \sum_i^n WD_i \quad \text{Equation 1.}$$

241 Where  $ES_{Cantareira}$  is the available water for withdrawal from the system,  $QN$  is the natural  
242 discharge from the reservoir  $i$  (sub-system) and  $WD$  is the specific water demand in each  
243 reservoir (such as the reservoir downstream urban supply).

244 It is worth noting the sub-basins areas in this case are smaller than each cell of the adopted  
245 climate model (400 km<sup>2</sup>) and although RCMs are an alternative to downscale the coarse  
246 resolution GCM, often RCM outputs deviate from the observed climatological data (Kim et al.,  
247 2015; Liersch et al., 2016; Smitha et al., 2018a). Therefore, in order to adjust the RCM output  
248 dataset, the projections of the Eta-INPE scenarios had to be spatially relocated and bias  
249 corrected from observed historical climate conditions (rain and temperature). For this, the  
250 "Additive Corrections and Scaling" method was used, a simple approach that assumes the

251 relative mean biases between observed data and model projections (Maraun and Widmann,  
252 2018; Smitha et al., 2018b). The hydrological discharge projections 2007-2099 forced by  
253 GCMs and RCPs scenarios can be seen in Appendix B (Fig. B-1).

### 254 3.2. SDF curve development

255 Following the flowchart of Figure 2, the Threshold Level Method (TLM) is traditionally used  
256 to estimate hydrological drought events from continuous discharge time series (Wanders et al.,  
257 2017). TLM was originally called ‘Crossing Theory Techniques’ and it is also referred to as  
258 run-sum analysis (Hisdal et al., 2004; Nordin and Rosbjerg, 1970; Şen, 2015). Usually, different  
259 criteria may be used to define the threshold in hydrological drought analysis by the TLM  
260 approach (Rivera et al., 2017; Şen, 2015; Tosunoglu and Kisi, 2016). In this study, two monthly  
261 desired-yield thresholds were implemented. They were defined from the pre-established water  
262 demand in the system (Hisdal et al., 2004; J. H. Sung and Chung, 2014). Initially, a stationary  
263 demand (SD) of 31 m<sup>3</sup>/s was defined as the historical average demand and another non-  
264 stationary demand (NSD) of 31 to 42 m<sup>3</sup>/s over time was defined as a hypothesis representative  
265 of the population growth in the SPRM (see Figure 3). These water demand values are consistent  
266 with the ANA/DAEE, 2004 study, according to the record and projection scenarios of the  
267 population growth of the IBGE<sup>1</sup>. On the other hand, the continuous discharge series were  
268 defined from the hydrological modelling result based on Eta-INPE historical dataset (baseline  
269 period 1962-2005). From the results of the TLM approach in the Cantareira System, the baseline  
270 (historical) scenario, based on Eta-MIROC5 model simulations, showed the greatest hydric  
271 deficit under the two water demand scenarios analyzed (SD and NSD), see Figure 3.

272

---

<sup>1</sup> Brazilian Institute of Geography and Statistics: <http://www.ibge.gov.br/home/>

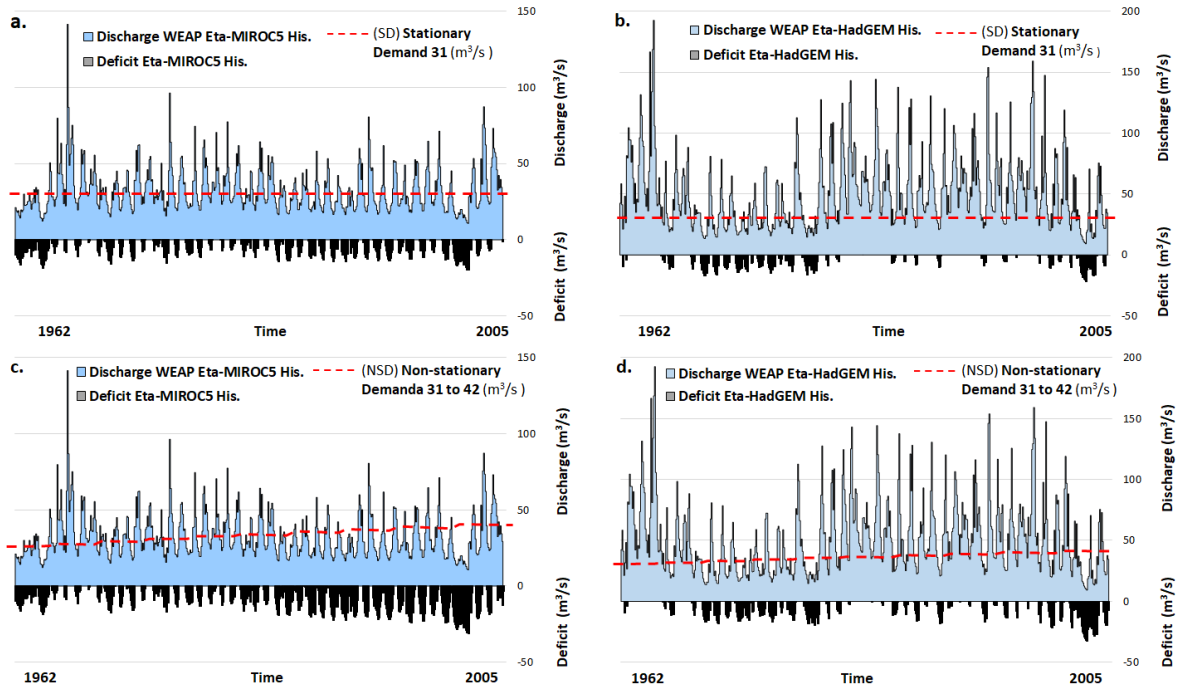

273  
 274 **Figure 3.** TLM Evaluation from historical discharge WEAP-Eta (base line scenarios), under Stationary (SD) and  
 275 Non-Stationary Demand (NSD) assumptions as the “threshold level”: a. 31 m<sup>3</sup>/s and Eta-MIROC5. b. 31 m<sup>3</sup>/s and  
 276 Eta-HadGEM. c. 31 to 42 m<sup>3</sup>/s and Eta-MIROC5. d. 31 to 42 m<sup>3</sup>/s and Eta-HadGEM. Total River basin 2265 km<sup>2</sup>.

277 Based on the time series of “severity” (or deficit, in m<sup>3</sup>) and duration (days) in the Cantareira  
 278 System, obtained from TLM evaluation of the Eta-INPE historical scenarios (see Figure 3), the  
 279 SDF curves were constructed. To estimate the return periods of drought events of a particular  
 280 severity and duration, the block maxima GEV frequency analysis distribution was used. In this  
 281 case, the GEV distribution is useful because it provides an expression that includes all three  
 282 types of extreme value distributions (Tung et al., 2006).

283 In various studies addressing SDF curve development, the GEV distribution was consistent  
 284 with the data sets of extremes, where distributions that use three parameters were required to  
 285 express the upper tail data (J H Sung and Chung, 2014; Svensson et al., 2016; Todisco et al.,  
 286 2013; Zaidman et al., 2003). On the other hand, it is suggested that for other durations of  
 287 drought, other probability distribution functions can be explored (Dalezios et al., 2000;  
 288 Razmkhah, 2016). However, in this study we took advantage of the versatility of the GEV  
 289 distribution, considering its flexibility to fit a set of data through the expressions:

$$290 \quad F(x) = \exp \left[ - \left\{ 1 + \xi \left( \frac{x-\mu}{\sigma} \right) \right\}^{1/\xi} \right] \quad \xi \neq 0 \quad \text{Equation 2.}$$

$$291 \quad F(x) = \exp \left[ - \exp \left( - \frac{x-\mu}{\alpha} \right) \right] \quad \xi = 0 \quad \text{Equation 3.}$$

292 Where the cumulative distribution function  $F(x)$  depends on  $\mu$  as a location parameter,  $\alpha$  as a  
293 scale parameter and  $\xi$  as a shape parameter. Therefore, if,  $\mu + \alpha/\xi \leq x \leq \infty$  for  $\xi < 0$  is a Type III  
294 (Weibull),  $-\infty \leq x \leq \infty$  for  $\xi = 0$  is a Type I (Gumbel), and  $-\infty \leq x \leq \mu + \alpha/\xi$  for  $\xi > 0$  is a Type  
295 II (Fréchet) distribution (Stedinger et al., 1993).

296 In order to fill a considerable number of events per interval, droughts were classified into four  
297 time intervals from 0 to 31, 0 to 90, 0 to 180 and 0 to 365 days. Thus, considering the adoption  
298 of the GEV distribution, the model parameters  $\xi$ ,  $\alpha$  and  $\mu$  for cumulative durations defined and  
299 return periods of 2, 10 and 100 years were estimated using the Method of Maximum Likelihood  
300 Estimator (MLE).

### 301 **3.3. Water price and Hydrological drought relationship**

302 According to the flowchart in Figure 2, drought can be addressed as a somewhat unusual  
303 economic phenomenon in that it affects both supply (the source) and demand (users), especially  
304 in systems dependent on water from a single source (Moncur, 1987). As expected, episodes of  
305 water scarcity pose technical, legal, social and economic problems for managers of urban water  
306 systems. Traditionally to overcome these episodes, reservoirs play a key role in water supply  
307 and demand management, providing security against hydrological extremes (Mehran et al.,  
308 2015). **However, when the water deficit intensifies, the structural measures are not enough and**  
309 **they must be accompanied by contingency measures, for example, water price regulation**  
310 **instruments, implemented as an incentive for more efficient use** (Mechler et al., 2017) .

311 In Brazil, each state-owned sanitation company has its own water charging policy, where the  
312 vast majority use block tariffs as a pricing policy, including SABESP (De Andrade Filho et al.,  
313 2015; Mesquita and Ruiz, 2013; Ruijs et al., 2008). In Sao Paulo State, the tariff policy system  
314 is regulated by Decree 41.446/96, also for services provided by SABESP. For the water tariff  
315 setting, several factors are taken into account, such as service costs, debtors forecast, expenses  
316 amortization, environmental and climatic conditions, quantity consumed, sectors and economic  
317 condition of the user (SABESP, 1996). These sectors are divided into residential, industrial,  
318 commercial or public, and the value that is charged for the service is always progressive. In  
319 other words, there is a standard minimum consumption with a fixed value and, based on that,  
320 such factors vary the consumption ranges (SABESP, 2018b). From the total water withdrawn  
321 from the Cantareira System, urban use is predominant in SPRM, where approximately 49% of  
322 the total is for household needs, 31% for industrial needs and 20% for irrigation  
323 (Consórcio/PCJ, 2013). In this study, we consider the water-withdrawal for domestic and  
324 industrial use in the SPMR, due to the direct dependence of these sectors on the SABESP water

325 supply network, as well as the supply priority that the domestic sector have according to  
326 Brazilian law during drought periods (Lei N° 9.433 do GOBERNO DO BRASIL, 1997).

327 Figure 4 shows the TLM analysis with a constant threshold under the same discharge scenario  
328 (SABESP 2000-2016), differentiated by the monthly and annual accumulation of the variable.  
329 The monthly step represents the system's natural discharge without regulation ("a" in Figure  
330 5), while the regulated discharge is represented by the annual aggregation of monthly natural  
331 discharges ("b" in Figure 5). Assuming this, without the reservoir system ("a" case), with direct  
332 water withdrawals (Threshold = 31 m<sup>3</sup>/s), the average accumulated deficit over these 17 years  
333 would be 225% greater than with the reservoir system implemented ("b" case).

334 The TLM analysis (Figure 5) showed two hydrological drought periods in 2000-2003 and 2010-  
335 2015: one with a lower and another with a higher deficit, respectively. While for the period  
336 from 2004 to 2009, a series of smaller droughts in both magnitude and frequency could be  
337 overcome by the reservoir system. On the other hand, in 2010-2015, the accumulated deficit,  
338 under the regulated scenario, would exceed the useful storage in 70% while for the period 2000-  
339 2003, the accumulated deficit only reached 43% of the system's useful storage capacity.  
340 Therefore, it is clear that over a long period of deficit or strong multi-year droughts, the storage  
341 system could be accompanied by other contingency complementary measures.

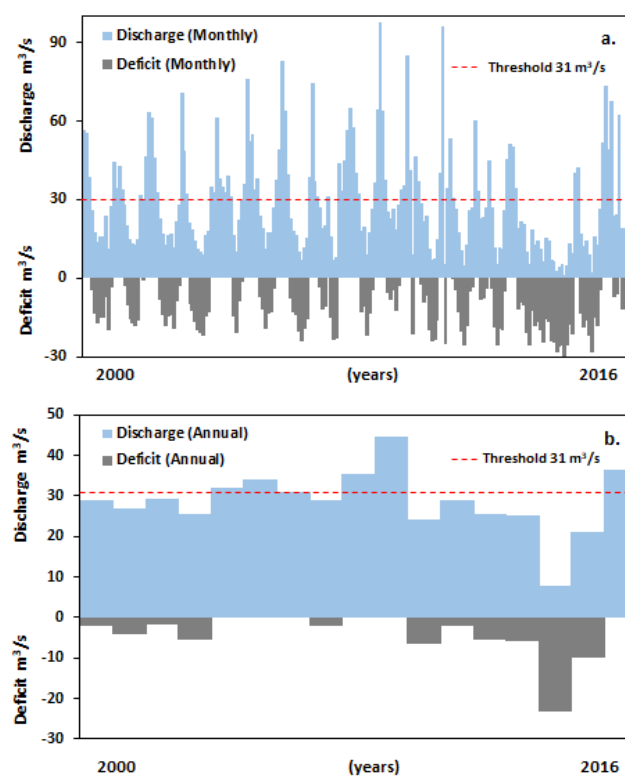

342  
343 **Figure 4.** TLM analysis under two time step assumptions during, 2000-2016 period and Threshold equal to 31  
344 m<sup>3</sup>/s. a) Monthly discharge and b) Annual discharge.

345 Urban drought management programs incur costs that must be assumed to overcome the water  
346 crisis with equity (Molinos-Senante and Donoso, 2016). SABESP in the SPMR, for example,  
347 through price-based policies<sup>2</sup> controlled the consumption rates of water users when the  
348 hydrological deficit scenarios were presented in the Cantareira System (Iglesias and Blanco,  
349 2008; Millerd, 1984; SABESP, 2018c, 1996). Therefore, during the 2014/2015 drought in  
350 SPRM, reactive economic contingencies were implemented, such as increased water tariffs,  
351 extra fees and price incentives, which had a detrimental effect on the company's profit margin,  
352 which provides the water resource (GESP, 2016; SABESP, 2017a, 2016a).

353 However, the financial exposure does not always exhibit a strong correlation with weather  
354 indices (Zeff and Characklis, 2013). We established a drought revenue loss cost estimation  
355 based on the Market Price method (Meyer et al., 2013). To do this, we developed an empirical  
356 relationship between the water price (impacts) and drought duration (severity) (Bachmair et al.,  
357 2016; Grafton and Ward, 2008; Hou et al., 2018; Mens et al., 2015). Based on the TLM  
358 approach, the monthly discharge time series and a constant threshold (31 m<sup>3</sup>/s) from 2000 to  
359 2018 (Figure 5) was analyzed; aiming to associate the drought characteristics with the  
360 adjustment rates of the SABESP database. On one hand, the upper part of Figure 5 shows the  
361 drought duration and the annual tariff adjustment with a Pearson correlation coefficient " $r_{xy}$ " of  
362 0.481 between them. On the other hand, the lower part represents the deficit volume for each  
363 drought duration. In this case, the Pearson correlation coefficient between drought duration and  
364 tariff adjustment showed an " $r_{xy}$ " value of 0.453.

365 From the calculated correlation coefficients, a T-student significance test with an alpha of 5%  
366 was implemented. Based on the test, it was found that the adjustment rate and the water deficit  
367 present a high to medium significance, despite having a lower correlation coefficient. However,  
368 in this study the drought duration was assumed as the feature to relate with water price, due to  
369 the frequency analysis of the series of annual maxima. Even though the correlation coefficient  
370 values showed relatively low values, the use of these drought characteristics may be useful  
371 given the lack of information regarding drought and its economic impacts on the study area.

---

<sup>2</sup> Database "percentage rate increase" 2001-2018 SABESP:

<http://www.sabesp.com.br/CalandraWeb/CalandraRedirect/?temp=4&proj=investidoresnovo&pub=T&db=&docid=9AA0FF2088FBF0A8832570DF006DE413&docidPai=AB82F8DBCD12AE488325768C0052105E&pai=filho10>

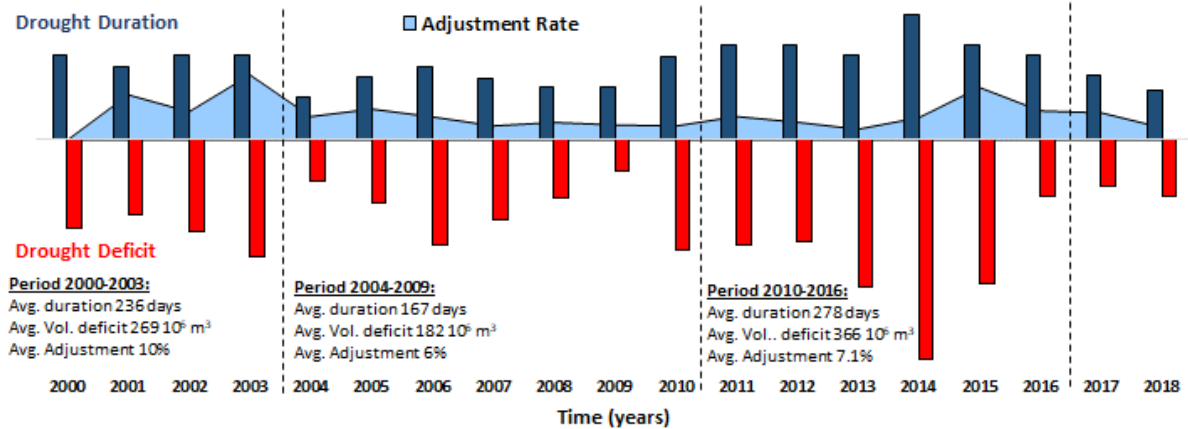

372

373 **Figure 5.** Empirical relationship between Cantareira System drought duration “blue-bar in days” [derived from  
 374 monthly average discharge analysis], Cantareira System drought deficit “red-bar in  $10^6\text{-m}^3$ ” and annual price  
 375 adjustment rates under variate hydrological conditions in percentage.

376 From the recent drought events in SPMR, which significantly affected the water supply i.e in  
 377 2000/2001 (Cavalcanti and Kousky, 2001) - 2013/2015 (Nobre et al., 2016) and the TLM  
 378 analysis that showed some degree of correlation between annual events and priced adjustment  
 379 rates, an empirical system analysis robustness against the drought duration was proposed (Mens  
 380 et al., 2015). Our robustness analysis is based on the assumption of the main impacts derived  
 381 from water supply problems in the SPRM, which appear to be related with medium to prolonged  
 382 duration events and medium to high severity (up to 365 days or two consecutive annual cycles).  
 383 Therefore, three priced-adjustment vs. drought duration scenarios were established (see Figure  
 384 E-2 in the supplementary material). First, 100% water availability. In this scenario, the  
 385 reservoir network is not essential to ensure water supply (drought duration between 0 and 90  
 386 days). Second, the water availability with supply warranty and dependence on the storage  
 387 system. In this scenario, the reservoir network provides resilience during droughts of smaller  
 388 magnitudes and duration (drought duration between 90 and 180 days). Third, stored water  
 389 shortage and forced interruption of supply. In this scenario, the water deficit prevails with extra  
 390 fees and other savings measures (drought duration between 90 and 365 days).

391 Since the water price formation study is not part of this work as it entails a complex  
 392 microeconomic analysis (Garrido, 2005), we adopted the average prices of water (Bulk Water  
 393 Tariff, 2016) in the SPMR, for the Domestic and Industrial sectors (SABESP, 2016b).  
 394 Therefore, based on the previous analysis (Figure 6), the following was adopted: First, during  
 395 the most severe droughts, an increase in the water tariff for the following period is expected.  
 396 Second, on the contrary, when the smaller deficits are overcome with the water stored in the  
 397 system, the increase in tariffs is a consequence of the annual Consumer Price Index (CPI) and

398 other tariff updates according to the law (SABESP, 2016b). Thus, the approach requires some  
 399 additional assumptions explained as follows:

- 400 i. Based on the current average prices for the domestic and industrial sectors, a base-water-  
 401 price was established to analyze US\$ 3.38 per m<sup>3</sup>, assuming that this value is given  
 402 considering normal supply conditions or 100% water availability,
- 403 ii. From the SDF curve construction intervals (cumulative drought duration) and three  
 404 class intervals of the annual tariff adjustment (min. 6% to max. 17%, see Figure E-1 in  
 405 appendix E), the water prices were established (see Table 1).

406 **Table 1. Main assumptions for establishing the tariff water price according to the drought duration.**

| Drought Duration Interval (days*) | Water Tariff Adjustment adopted (%) | Average price (US\$/ m <sup>3</sup> ) | Cantareira System robustness characteristics scenarios |
|-----------------------------------|-------------------------------------|---------------------------------------|--------------------------------------------------------|
| From 0 to 31                      | 0                                   | 3.38                                  | 100% water availability base scenario                  |
| From 0 to 90                      | 6                                   | 3.58                                  | 100% water availability                                |
| From 0 to 180                     | 10                                  | 3.71                                  | Water availability with storage dependency             |
| From 0 to 365                     | 17                                  | 3.95                                  | Water deficit (multi-year droughts)                    |

407 \* Cumulative drought duration

408 Table 1 represents the inelastic behavior of the Price Elasticity of Demand (PED) showing  
 409 closer intervals as water supplies are reduced due to drought and higher prices imposed to try  
 410 to reduce demands. Hence a successful price-based rationing policy requires a progressive  
 411 increase if the demand becomes predominantly inelastic (Mays and Tung, 2002), as the  
 412 proposed hypothesis establishes in this case. More studies of price elasticity and water scarcity  
 413 can be found in (Freire-González et al., 2017; Mansur and Olmstead, 2012; Ruijs et al., 2008).

414 The final step of the methodology (see Figure 2) defines the calculation of the drought impacts  
 415 through the management horizons (2007-2040, 2041-2070 and 2071-2099). This calculation  
 416 was carried out for the cumulative drought periods greater than 180 days, considering that from  
 417 this duration, the supply begins to show an important dependence of the Cantareira reservoir  
 418 System.

## 419 **4. Results and discussions**

### 420 **4.1. Hydrological modeling**

421 The hydrological model structure performed in monthly time steps and was calibrated-validated  
 422 following the described procedure in Section 3.1. To improve the calibration procedure,  
 423 multiple statistical evaluation criteria were used (Gibbs et al., 2018; Kumarasamy and Belmont,  
 424 2017). This is important because analyzing multiple statistics can provide an overall view of  
 425 the model based on a comprehensive set of indexes on the parameters representing the statistics  
 426 of the mean and extreme values of the hydrograph (Moriassi et al., 2007).



427 The equivalent system hydrograph for calibration and validation periods are shown in Figure  
 428 6. The colors in Figure 6 represent the classifications suggested by (Moriassi et al., 2007) and  
 429 are as follows: green for “very good” ( $NSE > 0.75$ ;  $PBIAS < \pm 10\%$ ;  $RSR < 0.50$ ), yellow for  
 430 “good or satisfactory” ( $0.75 > NSE > 0.5$ ;  $\pm 10\% < PBIAS < \pm 25\%$ ;  $0.50 < RSR < 0.60$ ), red for  
 431 “unsatisfactory” ( $NSE < 0.5$ ;  $PBIAS > \pm 25\%$ ;  $RSR > 0.70$ ). Moreover, the correlation  
 432 coefficient ( $R^2$ ) and the VE criterion values close to 1.0 mean that the prediction dispersion is  
 433 equal to that of the observation (Krause and Boyle, 2005; Muleta, 2012). It is important to note  
 434 that in the validation period (2011-2015), most of the recent drought event were simulated with  
 435 an acceptable performance, although there is a tendency to overestimate periods of low flow.

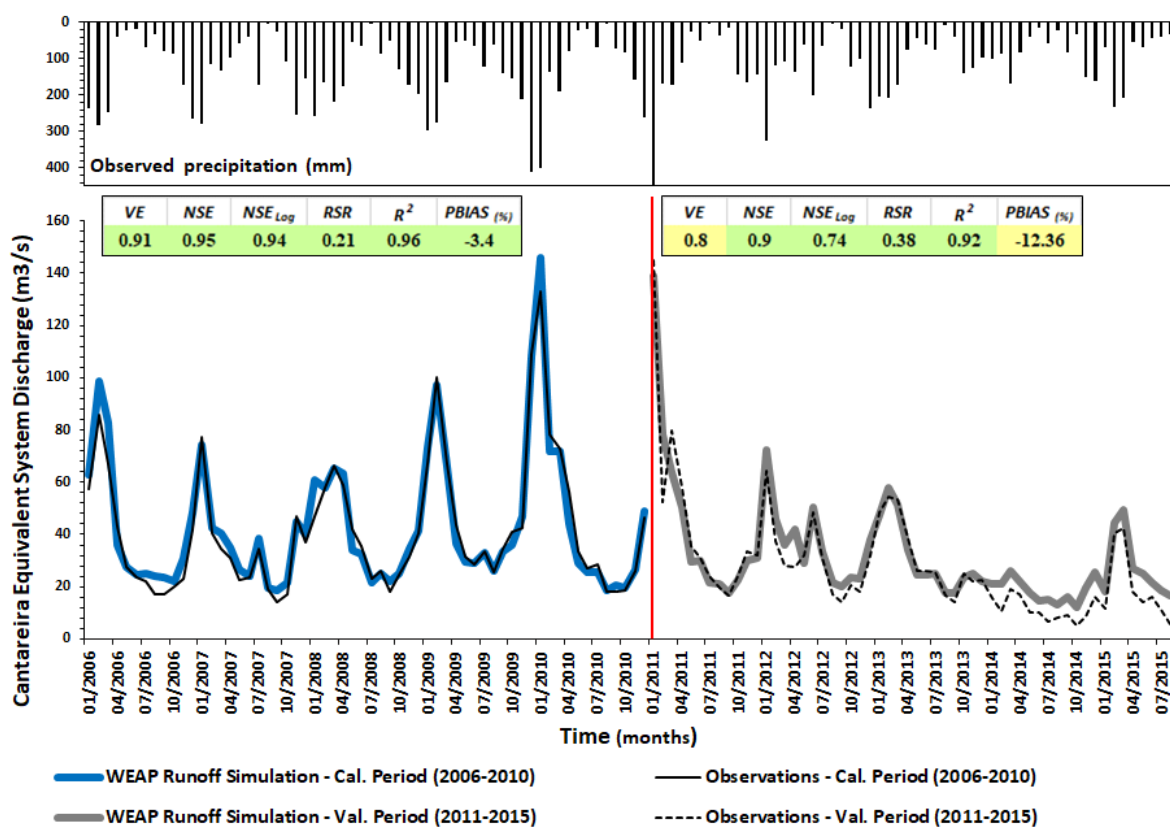

436  
 437 **Figure 6.** WEAP Hydrographs Cantareira Equivalent System (ES) performance criteria for Calibration (2006 -  
 438 2010) - Validation (2011 – 2015) periods. The calibration and validation performance criteria for each sub-basin  
 439 in the system can be found in the “Complementary Material” - Appendix A. – Table A-1.

440 Individual watershed hydrological modelling performance ratings are presented in Appendix-  
 441 A, Table A-1. Moreover, several statistical criteria were considered in the evaluation of the  
 442 calibration process, where each criterion covers a different aspect of the resulting hydrograph.  
 443 Five sub-basins were modeled within the Jaguarí-Jacareí sub-system (Sub B-F28, B-F23, B-  
 444 F25, Jaguarí and Jacareí). This five sub-system represents approximately 46% of the total  
 445 available water and showed the best modelling performance statistics, compared to the other  
 446 subsystems.

447 **4.2. SDF curves**

448 Using the traditional frequency analysis, the severity-duration-frequency curves for two  
 449 threshold levels and two discharges (from Historical\_RCMs WEAP outputs) were developed  
 450 as shown in Fig. 7. For the SDF curves configuration, the Generalized Extreme Values (GEV)  
 451 function was used. It can, therefore be observed from the SDF results that according to the fit  
 452 data set (Appendix C), the shape parameter ( $\xi$ ) varies with the drought duration, therefore for a  
 453 drought interval of more than 180 days, the Probability Distribution Function (PDF) Type I  
 454 presents a better fit, even for the two proposed demand scenarios. On the other hand, droughts  
 455 with duration intervals of less than 90 days, under stationary and non-stationary demand  
 456 scenarios, had a better fit to FDP Type III (see Tables D-1 to D-4 in Appendix D). Moreover,  
 457 the fit diagnostic plots "Empirical quantile vs Model quantile" (QQ-plot) and "Return level vs  
 458 Return period" (RR-plot) show the relationship between the model, the data fit and prediction  
 459 capacity (Appendix C). Therefore, in terms of the quantiles, the QQ-plot shows the data trend  
 460 to follow the model line in most cases. While the predictive capacity of the model, represented  
 461 by the RR-plot, shows a decrease as the return period increases.

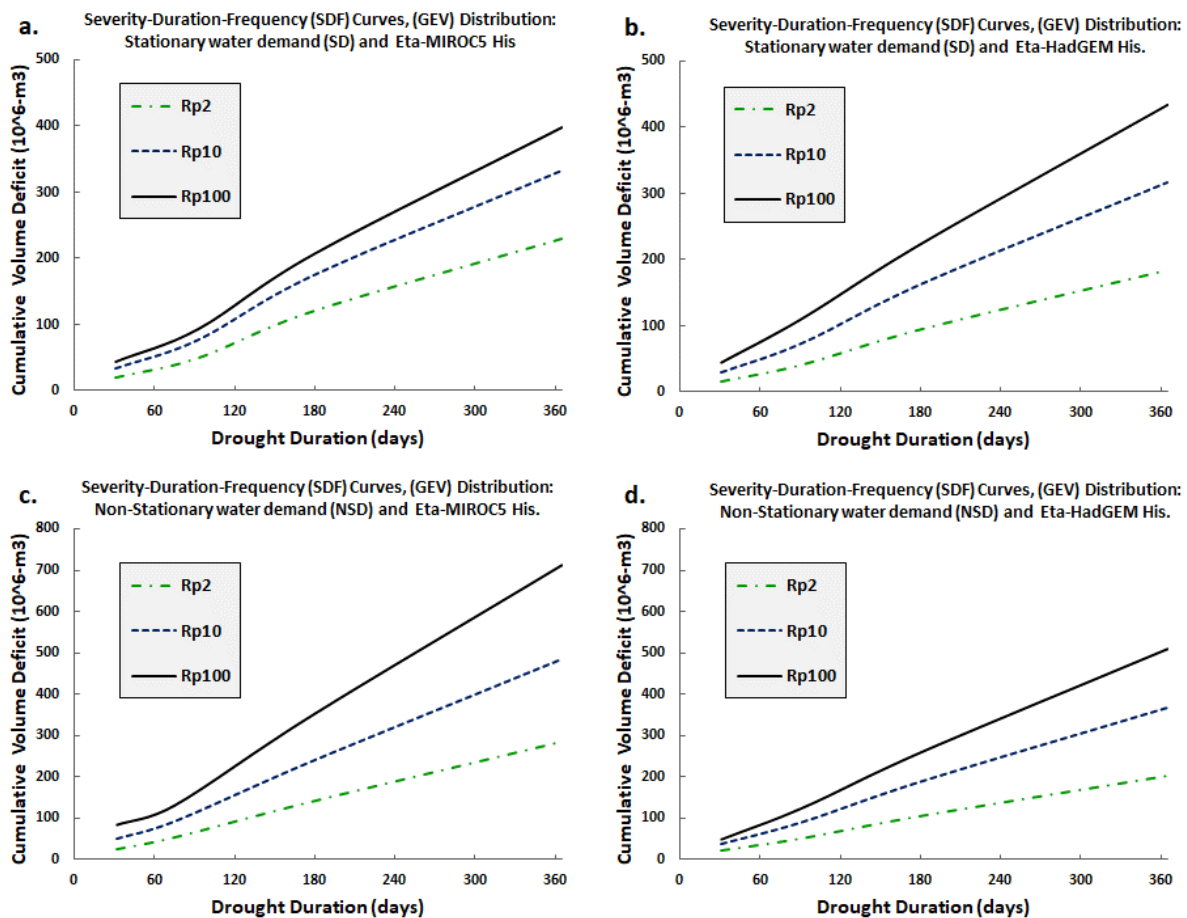

462

463 **Figure 7.** SDF curves under stationary and non-stationary demand assumptions and historical discharge WEAP-  
 464 Eta scenarios: a. (SD) 31 m<sup>3</sup>/s and Eta-MIROC5. b. (SD) 31 m<sup>3</sup>/s and Eta-HadGEM. c. (NSD) 31 to 42 m<sup>3</sup>/s and  
 465 Eta-MIROC5. d. (NSD) 31 to 42 m<sup>3</sup>/s and Eta-HadGEM.

466 Based on the relationship between the Cantareira System Drought-Cost-Robustness curve (see  
 467 details in Figure E-2 supplementary material) and the SDF curves (see Figure 7), the base  
 468 functions of Severity-Duration-Impact of drought were built to estimate the base-line scenarios  
 469 of damage cost in the water utility company. These scenarios are shown in Figure 8, under  
 470 different recurrence events (Rp scenarios), climate projections (RCPs – RCMs) and demand  
 471 variability scenarios (SD – NSD). Each pair of lines in Figure 8 (continuous and dashed), show  
 472 a range of uncertainty associated with the considered change drivers.

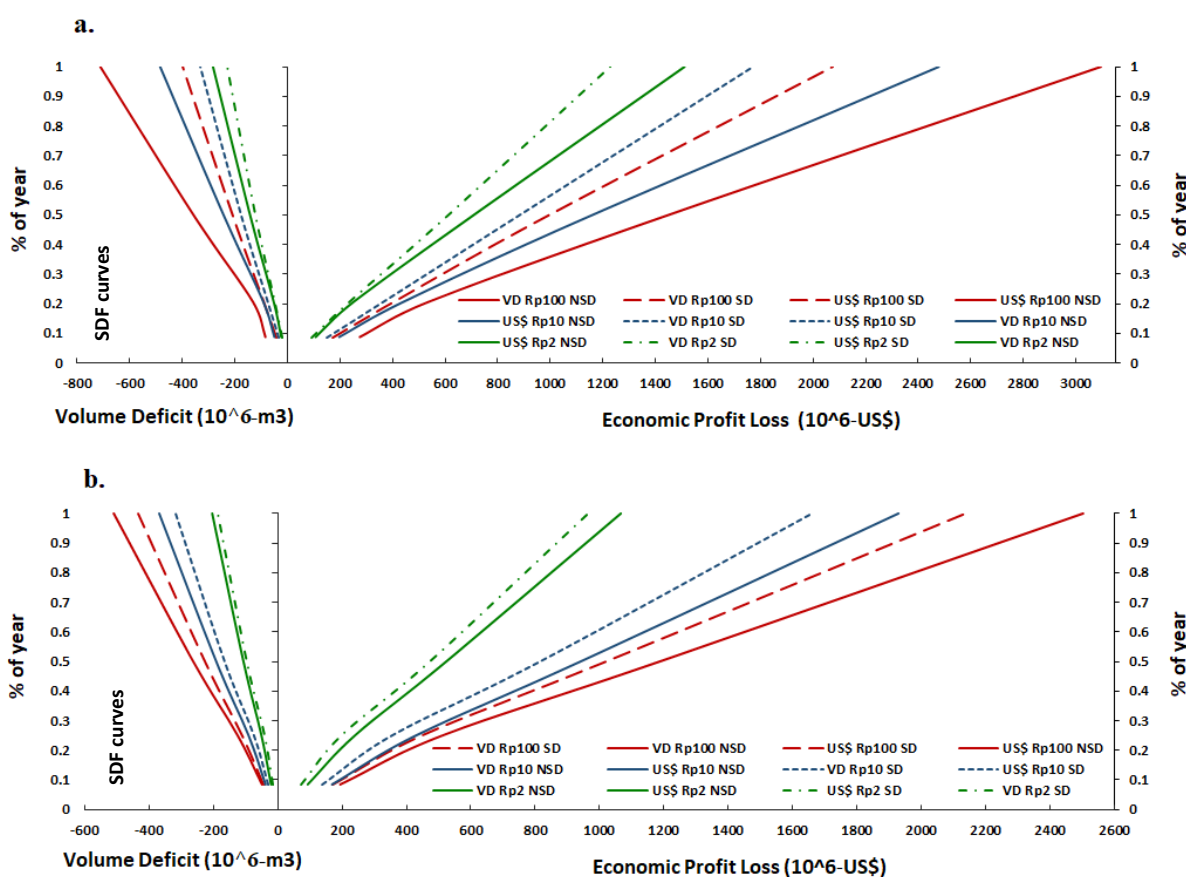

473  
 474 **Figure 8.** Severity-Duration-Impact curves. Sector **a.** Severity-Duration-Frequency-Profit Loss under the  
 475 historical *Eta-MIROC5* scenario. Sector **b.** Severity-Duration-Frequency-Profit Loss under the historical *Eta-*  
 476 *HadGEM* scenario. Note: *SD* and *NSD* are the stationary or non-stationary demands, respectively; “*VD*” is the  
 477 volume deficit, under return period of 2, 10 and 100 years; % of year is the drought event duration in relation to one  
 478 year.

### 479 4.3. Economic impacts under climate change

480 The results describe the net present value (NPV) of the potential economic impacts produced  
 481 by hydrological drought durations greater than 180 days. These impacts are presented  
 482 considering the climate, demand, severity and recurrence scenarios during the analysis periods:

483 2007-2040, 2041-2070 and 2071-2099. The evaluation of the drought's economic impact in the  
484 water company showed in general, revenue losses per analysis period between 0.003% and  
485 0.021% related to the GDP in the SPMR in 2017 (SEADE, 2018). This relatively low range of  
486 percentage revenue losses is, in fact, significant for the regional economy since SPMR accounts  
487 for approximately 18% of the Brazilian GDP.

488 Figure 9 shows the economic impacts on the water utility company under an analysis that  
489 independently discriminates radiation scenarios (RCP), GCM and water demand. Figure 9 also  
490 compares the relative difference between scenarios and time periods, using the median statistic  
491 and standard deviation, the latter as a measure of dispersion. In general, the results in Figure 9  
492 reveal that under the driver water demand, the most propitious scenarios are configured for the  
493 generation of greater economic impacts (on average), followed by radiation and GCM drivers,  
494 respectively. Likewise, in Sector "a", the impacts analyzed under RCP scenarios 4.5 and 8.5  
495 showed a low difference percentage in variability and median. This can be explained from the  
496 study by Chou et al. 2014, where the Eta-INPE results establishes that, in the future, there is no  
497 clear trend in the average precipitation and during the summer, the time series show a trend for  
498 a reduction in precipitation in both emission scenarios, RCP 8.5 and 4.5. While for sector "b"  
499 (RCM), the outputs nested in Eta-MIROC5 presented higher revenue losses in the company  
500 than those based on HadGEM-ES. This difference can be attributed to the annual cycle of  
501 precipitation, which shows that the ETA-INPE simulations driven by MIROC5 produces  
502 generally less precipitations during the dry season, therefore the water deficit during this period  
503 will be more critical (Chou et al 2014a). Finally, sector "c", where the Non-stationary demand  
504 (NSD) trend imposed the larger differences in the magnitude and variability percentage impacts  
505 (human influences), suggesting that the demand-related (population growth) uncertainty would  
506 be far greater than that associated with climate sensitivity.

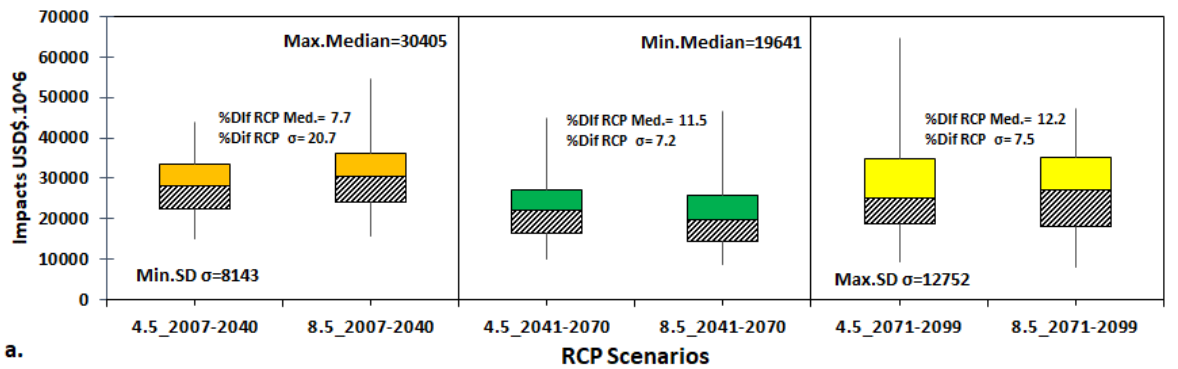

a.

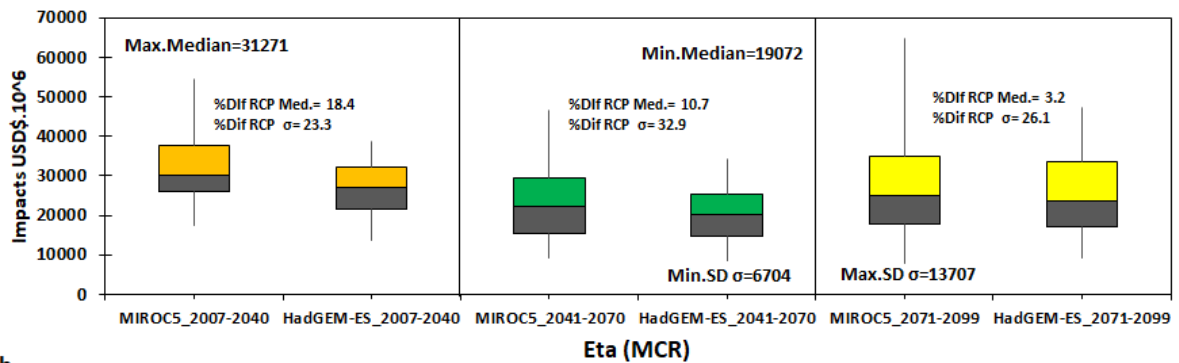

b.

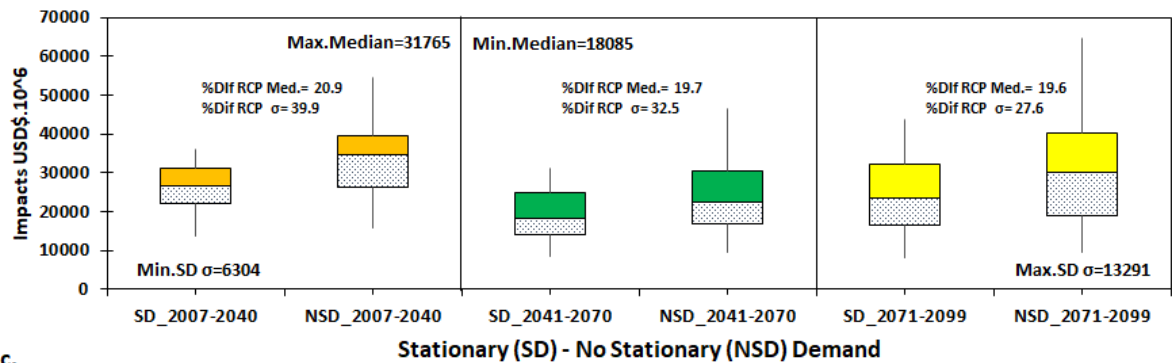

c.

508

509 **Figure 9.** Impacts and relative differences between scenarios in median 50<sup>th</sup> percentile (Med.) and standard  
 510 deviation ( $\sigma$ ). Sector “a”: Impacts based on RCP scenarios. Sector “b”: Impacts based on RCM scenarios. Sector  
 511 “c”: Impacts based on demand scenarios. Through analysis periods, Orange (2007-2040), Green (2041-2070) and  
 512 Yellow (2071-2099).

513 Under a different grouping configuration for the analysis of the results (see Figure 10), the  
 514 impacts assessment was conditioned by the scenarios joint study of climate forcing (Eta-GCM)  
 515 and radiation (RCP). Based on this scheme, it was found that the largest economic impact was  
 516 represented by the Eta-MIROC5\_4.5 climate-forcing scenario, while smaller impacts (on  
 517 average) were observed in the Eta-HadGEM-ES\_4.5 scenario. In addition, the Eta-MIROC5  
 518 scenario showed the maximum values of the median 50<sup>th</sup> percentile (Max.Med.) and standard  
 519 deviation (Max.SD) between the set of time period panels, which concludes that the climate

520 forcing based on the MIROC5 model is the main driver of the impacts and variability between  
 521 analyzed climate drivers (GCM).

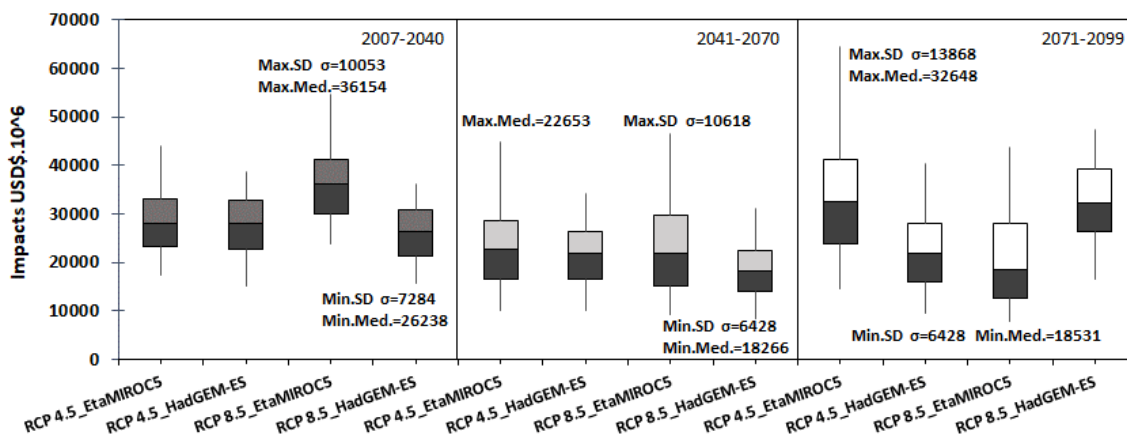

522  
 523 **Figure 10.** Economic impacts comparison between Eta-INPE\_RCP\_GCM based scenarios throughout the  
 524 projection time period: first panel 2007-2040, second panel 2041-2070 and third panel 2071-2099.

525 Figure 11 describes a third results analysis scheme. In this case, the impacts are evaluated based  
 526 on the return periods. In the box plot of Figure 13, an increasing tendency of the dispersion is  
 527 observed in the measure in which the projected time horizon is more distant, probably due to  
 528 the greater uncertainty in future climate projections (Cubasch et al., 2001). On the other hand,  
 529 the higher periods of return reflect impacts of greater magnitude, as expected.

530 In all cases, the average economic impacts projected for the period 2040-2071 presented lower  
 531 values compared with the other two periods analyzed. According to a study by Lyra et al. (2017)  
 532 in which the most recent Eta-INPE model simulations were performed at more detailed scales,  
 533 the annual total precipitation (PRCPTOT) and maximum number of consecutive days with  
 534 precipitation (CDD - CWD) indexes for the Sao Paulo region showed better results in terms of  
 535 favoring water availability during this period. On the contrary, the period 2007-2040 presented  
 536 the greatest economic impacts (evidence of the recent water crisis) with the lowest dispersion  
 537 (less uncertainty) in relation to the other projected time periods. While the projection of the  
 538 2071-2099 period showed an impact magnitude close to the 2007-2040 period, given that both  
 539 Eta-INPE simulations intensify the reduction of precipitation toward the end of the century in  
 540 Southeast Brazil, with an annual rainfall reduction above 40% and a reduction of precipitation  
 541 extremes (Chou et al., 2014a; Lyra et al., 2017).

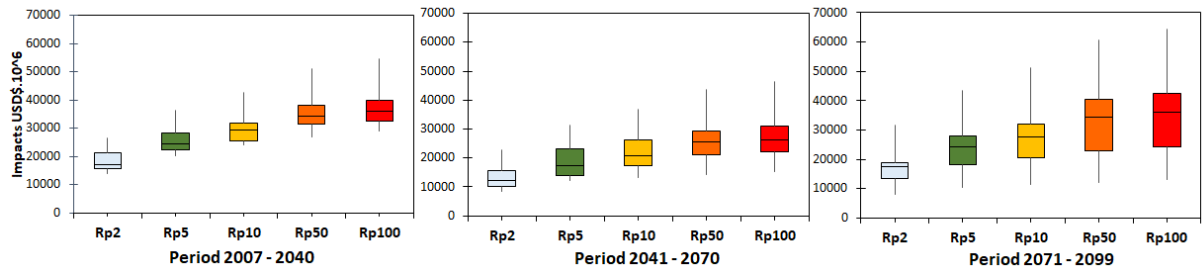

542

543 **Figure 11.** Drought impact variability between return period scenarios during the projection periods: first panel  
 544 2007-2040, second panel 2041-2070 and third panel 2071-2099.

545 **4.4. Considerations on Uncertainties**

546 The methodology adopted here includes a model chain, typical in exercises of hydrological  
 547 regime projection through hydrologic modelling under climate change projections (Fowler et  
 548 al., 2007; Jones, 2000; Wilby and Harris, 2006). This model chain incorporates several sources  
 549 of uncertainty such as those listed by Honti et al. (2014) and Jobst et al., (2018): 1) the climate  
 550 model; 2) the downscaling method or an RCM application, the latter as in our work; 3) the  
 551 hydrological model, and (4) the inherent modeling uncertainty of coupling different climate-  
 552 hydrology spatiotemporal scales.

553 In this case, the systematic analysis of change drivers (uncertainty sources) offers a set of results  
 554 around potential scenarios to frame uncertainty (Refsgaard et al., 2007; Rodrigues et al., 2015)  
 555 while the drivers sensitivity analysis is proposed as a part of the results in this study. Montanari  
 556 (2007), however, advocates that some methods commonly used for uncertainty assessment do  
 557 not address uncertainty, but only model sensitivity. Moreover, although some studies indicate  
 558 that the climate projections surpass the hydrological uncertainties (Bates et al., 2008; Nóbrega  
 559 et al., 2011), Honti et al. (2014) reinforces that different methods of uncertainty assessment  
 560 may lead to different conclusions.

561 Our methodology also included a drought indicator development, through the TLM approach,  
 562 demand scenarios and a drought cost estimation based on the Market Price method. (Hou et  
 563 al., 2018; Mens et al., 2015). Results showed that drought deficits are influenced not only by  
 564 the modeled inflows at a lumped scale, throughout the period of 2007-2099, but also in our case  
 565 study by the reservoir operation. In fact, the spatially-combined operation of existing reservoirs  
 566 may be different from our considerations, adopting an “equivalent system” (ES) without a  
 567 future layout change. On the one hand, the system demand scenarios are based on current  
 568 (historical period 2004-2016, (SABESP, 2017b)) best knowledge information, and the adoption  
 569 of two scenarios aimed at giving a broader, realistic view of the different possible outcomes

570 due to expected population growth (ANA and DAEE, 2004; IBGE, 2018). On the other hand,  
571 the economic loss estimation, based on the aforementioned drought event measures, does not  
572 incorporate eventual market changes, currency changes or even subsidies. Conversely, our loss  
573 estimation assumes that those economic measures, i.e. water tariff adjustments were and would  
574 continue being adopted by the water utility, as a trigger determinant once the drought hazard  
575 happened. Because this triggering factor would temporarily occur either promptly or slowly,  
576 when structural measures were not enough to secure water supply under eventual hydro-  
577 meteorological conditions and water demand, uncertainties in cost analysis could increase.

## 578 **5. Conclusions and recommendations**

579 This paper developed a methodology with application to assess economic impacts of drought  
580 risks for water utilities through an **assessment** under climate and water demand scenarios. **In**  
581 **this example,** the SDF framework has linked climate, hydrology and economy factors, using  
582 Sao Paulo Metropolitan Region dependence on the Cantareira Water Supply System, Brazil. In  
583 this paper, we consider these results preliminary, but with valuable information for a water  
584 utility interested in the drought risk losses.

585 Methodologically, first we characterized the hydrological droughts through the SDF curves,  
586 from the hydrological modeling by the baseline period of the RCM. Second, the SDF was  
587 coupled with a local water demand development based on the supply warranty time percentage  
588 during the drought events. Under these assumptions, an empirical drought economic impact  
589 curve was setup, representing the Water Utility Company profit losses due to the impossibility  
590 of supplying demand during hydrological drought periods. **Additionally, our results could elicit**  
591 **further implications for drought risk reduction and management.**

592 **The main results of the methodology implemented were: the great financial vulnerability of the**  
593 **water utility company of the SPMR against the hydrological drought. Possibly the maximum**  
594 **supply capacity of the system is reaching its limit due to the growing demand and the new**  
595 **challenges represented by climate change. The main driver of economic impacts under the**  
596 **analysis scheme turned out to be the water demand dynamics. The Eta-MIROC5 scenario**  
597 **proved to be primarily responsible for the economic impacts compared to other climate drivers.**  
598 **Comparatively, the RCP 4.5 and 8.5 radiation scenarios showed no major difference between**  
599 **them. The scenario of projected impacts for the period 2071-2040 showed the greatest**  
600 **dispersion among time scenarios, while the closest scenario 2007-2041 showed less dispersion**  
601 **and greater impacts on average. The WEAP model proved to be a versatile tool for the**



602 construction-calibration-validation process of the model, when it is implemented in climate  
603 impact studies. The approach for the characterization of the drought "TLM" showed to be a tool  
604 easily applicable to describe quantitative changes in hydrological drought during long periods  
605 with change in water demands (Thresholds).

606 On one hand, this SDF framework could help analyze the impacts from key drivers, such as  
607 climate, land use and water withdrawal rates in complex or recurrent drought patterns. In  
608 addition, this SDF framework could link interdisciplinary studies, with broader relationships in  
609 relation to water security, energy security and food security. Thus, we recommend future  
610 research of the SDF framework linked to: Palmer's drought indices (Rossato et al., 2017); a  
611 model-based framework to disaster management (Horita et al., 2017); an ecosystem-based  
612 assessment for Eco-hydrological modelling (Taffarello et al., 2018); effectiveness of drought  
613 securitization under climate change scenarios (Mohor and Mendiondo, 2017). Moreover, the  
614 SDF framework is capable of integrating actions towards: dynamic price incentive programs  
615 related to wise human-water co-evolution patterns; water-sensitive programs under deep  
616 cultural features; socio-hydrological observatories for water security; feasibility analysis of the  
617 economic impacts of implementing new technologies for water economy and flow  
618 measurement; leakage control; detecting and legalizing illegal connections and water reuse,  
619 among others. Furthermore, dissimilarities pointed out from climate scenarios (see Figure 11)  
620 would suggest a set of possibilities to face the uncertainty. For instance, the SDF framework  
621 would guide the decision-making of water utility profits to cope with economic impacts of  
622 drought risks in the long and medium term. In addition, the expected profit loss over the long-  
623 term would serve as the initial estimate for financial contingency arrangements as insurance  
624 schemes or community contingency funds. In general, the SDF framework developed here can  
625 be proposed as a planning tool to mitigating drought-related revenue losses, as well as being  
626 useful for the development of water resource securitization strategy in sectors that depend on  
627 water to sustain their economies.

628 The following should be considered for further studies to strengthen decision-making based on  
629 results of the tool: despite having achieved an acceptable performance, the inclusion of more  
630 gauge stations could not only improve calibration performance but also cover a larger sample  
631 space of events, increasing the confidence of projections. Introduce a direct measure of the  
632 economic impacts resulting from multi-year deficits of annual duration not entire, although, the  
633 methodology can assimilate multiple consecutive years and entire deficits, the cumulative  
634 impacts would be underestimated. On the other hand, in order to have a methodological

635 comparative standard, more regional studies of SDF curves need to be implemented,  
636 considering the spatialized analysis and broader statistics methods. Finally, it is a fact that the  
637 reliability of SDF curve estimates depend on the quality and extent of the records used, or in  
638 this case, the capacity of regional climate models to reproduce the observed distribution of  
639 extreme events.

## 640 **Acknowledgments**

641 The authors would like to thank the support from several agencies in Brazil and Colombia: the  
642 Administrative Department of Science, Technology and Innovation (COLCIENCIAS) Doctoral  
643 Program Abroad No 728-2015, CAPES-PROEX-1650/2017/23038.013525/2017-30, CAPES  
644 Pró-Alertas #88887.091743/2014-01, CNPq #307637/2012-3, CNPq #312056/2016-8 PQ and  
645 CNPq #465501/2014-1 and FAPESP 2014/50848-9 Water Security of the INCT-Climate  
646 Change II. The Sao Paulo State Water Utility Company, SABESP, kindly provided relevant  
647 information for this study. All co-authors declare no conflict of interest. The third author thank  
648 to Coordination of Superior Level Staff Improvement (CAPES) and to the Programme of  
649 Postgraduate in Hydraulics and Sanitation (PPG-SHS) for the postdoctoral fellowship.

650

651 **Detailed information is available in the Supplementary Material.**

652

## 653 **References**

- 654 ANA, DAEE, 2004. Subsídios para a Análise do Pedido de Outorga do Sistema Cantareira e  
655 Para a Definição das Condições de Operação dos seus Reservatórios. Estado de São Paulo.
- 656 Angarita, H., Wickel, A.J., Sieber, J., Chavarro, J., Maldonado-ocampo, J.A., 2018. Basin-scale  
657 impacts of hydropower development on the Mompós Depression wetlands , Colombia.  
658 Hydrol. Earth Syst. Sci. 22, 2839–2865.
- 659 Asadieh, B., Krakauer, N.Y., 2017. Global change in flood and drought intensities under  
660 climate change in the 21st century. Hydrol. Earth Syst. Sci. 1–22.
- 661 Bachmair, S., Svensson, C., Hannaford, J., Barker, L.J., Stahl, K., 2016. A quantitative analysis  
662 to objectively appraise drought indicators and model drought impacts. Hydrol. Earth Syst.  
663 Sci. 20, 2589–2609. doi:10.5194/hess-20-2589-2016
- 664 Balbus, J., 2017. Understanding drought’s impacts on human health. Lancet Planet. Heal. 1,  
665 e12. doi:10.1016/S2542-5196(17)30008-6
- 666 Bates, B.C., Kundzewicz, Z.W., Wu, S., Palutikof, J.P., 2008. Climate Change and Water,

667 Climate change and water. doi:10.1016/j.jmb.2010.08.039

668 Baumgärtner, S., Strunz, S., 2014. The economic insurance value of ecosystem resilience. *Ecol.*  
669 *Econ.* 101, 21–32. doi:10.1016/j.ecolecon.2014.02.012

670 Berman, J.D., Ebisu, K., Peng, R.D., Dominici, F., Bell, M.L., 2013. Articles Drought and the  
671 risk of hospital admissions and mortality in older adults in western USA from 2000 to  
672 2013 : a retrospective study. *Lancet Planet Heal.* 1, e17–e25. doi:10.1016/S2542-  
673 5196(17)30002-5

674 Bhave, A.G., Mishra, A., Raghuwanshi, N.S., 2014. A combined bottom-up and top-down  
675 approach for assessment of climate change adaptation options. *J. Hydrol.* 518, 150–161.  
676 doi:10.1016/j.jhydrol.2013.08.039

677 Bressers, H., Bressers, N., 2016. Introduction: Why Governance for Drought Resilience?, in:  
678 *Governance for Drought Resilience Land and Water Drought Management in Europe.*  
679 *springer Open, AG Switzerland*, p. 266. doi:10.1007/978-3-319-29671-5

680 Buurman, J., Mens, M.J.P., Dahm, R.J., 2017. Strategies for urban drought risk management: a  
681 comparison of 10 large cities. *Int. J. Water Resour. Dev.* 33, 31–50.  
682 doi:10.1080/07900627.2016.1138398

683 Cavalcanti, I.F.A., Kousky, V.E., 2001. Drought in Brazil During Summer and fall 2001 and  
684 Associated Atmospheric Circulation Features. *Rev. Climanalise* 1, 1–10.

685 Chou, S.C., Lyra, A., Mourão, C., Dereczynski, C., Pilotto, I., Gomes, J., Bustamante, J.,  
686 Tavares, P., Silva, A., Rodrigues, D., Campos, D., Chagas, D., Sueiro, G., Siqueira, G.,  
687 Marengo, J., 2014a. Assessment of Climate Change over South America under RCP 4.5  
688 and 8.5 Downscaling Scenarios. *Am. J. Clim. Chang.* 03, 512–527.  
689 doi:10.4236/ajcc.2014.35043

690 Chou, S.C., Lyra, A., Mourão, C., Dereczynski, C., Pilotto, I., Gomes, J., Bustamante, J.,  
691 Tavares, P., Silva, A., Rodrigues, D., Campos, D., Chagas, D., Sueiro, G., Siqueira, G.,  
692 Nobre, P., Marengo, J., 2014b. Evaluation of the Eta Simulations Nested in Three Global  
693 Climate Models. *Am. J. Clim. Chang.* 03, 438–454. doi:10.4236/ajcc.2014.35039

694 Consórcio/PCJ, 2013. *Sistema Cantareira : Um Mar de Desafios. Compilado de Textos,*  
695 *Informações e Subsídios voltados a Renovação da Outorga do Sistema Cantareira.* Sao  
696 Paulo.

697 Coutinho, R.M., Kraenkel, R.A., Prado, P.I., 2015. Catastrophic Regime Shift in Water  
698 Reservoirs and São Paulo Water Supply Crisis. *PLoS One* 1–14.  
699 doi:10.1371/journal.pone.0138278

700 Cubasch, U., Meehl, G. a., Boer, G.J., Stouffer, R.J., Dix, M., Noda, A., Senior, C. a., Raper,

701 S., Yap, K.S., 2001. Projections of Future Climate Change, Climate Change 2001: The  
702 Scientific Bases. Contribution of Working Group I to the Third Assessment Report of the  
703 Intergovernmental Panel on Climate Change.

704 Dalezios, N.R., Loukas, A., Vasiliades, L., 2000. Severity-duration-frequency analysis of  
705 droughts and wet periods in Greece. *Hydrol. Sci. J.* 45. doi:10.1080/02626660009492375

706 De Andrade, C., 2016. Managing Water ( In ) security in Brazil- Lessons from a Megacity,  
707 International Development. London.

708 De Andrade Filho, M., Ortiz, J., de Oliveira, M., 2015. Water Pricing in Brazil: Successes,  
709 Failures, and New Approaches, in: Dinar, A., Pochat, V., Albiac-Murilo, J., Farolfi, S.,  
710 Saleth, R. (Eds.), *Water Pricing Experiences and Innovations*. Springer International  
711 Publishing Switzerland 2015, Springer Cham Heidelberg New York Dordrecht London,  
712 p. 485. doi:10.1007/978-3-319-16465-6

713 De Oliveira, J.B., Camargo, M., Rossi, M., Filho, B.C., 1999. Mapa Pedológico do Estado de  
714 São Paulo, 1 Edition. ed. Embrapa, IAC, Campinas.

715 Doherty, J., Skahill, B.E., 2006. An advanced regularization methodology for use in watershed  
716 model calibration. *J. Hydrol.* 564–577. doi:10.1016/j.jhydrol.2005.11.058

717 Dufek, A.S., Ambrizzi, T., 2008. Precipitation variability in São Paulo State, Brazil. *Theor.*  
718 *Appl. Climatol.* 93, 167–178. doi:10.1007/s00704-007-0348-7

719 Esteve, P., Varela-ortega, C., Blanco-gutiérrez, I., Downing, T.E., 2015. A hydro-economic  
720 model for the assessment of climate change impacts and adaptation in irrigated agriculture.  
721 *Ecol. Econ.* 120, 49–58. doi:10.1016/j.ecolecon.2015.09.017

722 Falkenmark, M., Lannerstad, M., 2004. Consumptive water use to feed humanity – curing a  
723 blind spot. *Hydrol. Earth Syst. Sci. Discuss.* 1, 7–40. doi:10.5194/hessd-1-7-2004

724 Forni, L.G., Medellín-azua, J., Tansey, M., Young, C., Purkey, D., Howitt, R., 2016.  
725 Integrating complex economic and hydrologic planning models\_ An application for  
726 drought under climate change analysis. *Water Resour. Econ.* 16, 15–27.  
727 doi:10.1016/j.wre.2016.10.002

728 Foster, T., Brozovic, N., 2018. Simulating Crop-Water Production Functions Using Crop  
729 Growth Models to Support Water Policy Assessments. *J. Ecol. Econ.* 152, 9–21.  
730 doi:10.1016/j.ecolecon.2018.05.019

731 Fowler, H.J., Blenkinsop, S., Tebladi, C., 2007. Review Linking climate change modelling to  
732 impacts studies: recent advances in downscaling techniques for hydrological modelling.  
733 *Int. J. Climatol.* 4, 1549–1555. doi:10.1002/joc

734 Freire-González, J., Decker, C., Hall, J.W., 2017. The Economic Impacts of Droughts: A

735 Framework for Analysis. *Ecol. Econ.* 132, 196–204. doi:10.1016/j.ecolecon.2016.11.005

736 Frick, D.M., Bode, D., Salas, J.D., 1990a. Effect of Drought on Urban Water Supplies. I:  
737 Drought Ananlysis. *J. Hydraul. Eng.* 116, 733–753.

738 Frick, D.M., Bode, D., Salas, J.D., 1990b. Effect of Drought on Urban Water Supplies. II:  
739 Water-Supply Analysis. *J. Hydraul. Eng.* 116, 754–764.

740 Garrido, R., 2005. Price Setting for Water Use Charges in Brazil Price Setting for Water Use  
741 Charges in Brazil. *Int. J. Water Resour. Dev.* 21, 99–117.  
742 doi:10.1080/0790062042000316839

743 GESP, 2016. Relatório da Administração 2016 - Companhia de Saneamento Básico do Estado  
744 de São Paulo - SABESP. Sao Paulo.

745 Gibbs, M.S., McInerney, D., Humphrey, G., Thyer, M.A., Maier, H.R., Dandy, G.C., Kavetski,  
746 D., 2018. State updating and calibration period selection to improve dynamic monthly  
747 streamflow forecasts for an environmental flow management application. *Hydrol. Earth  
748 Syst. Sci.* 22, 871–887. doi:10.5194/hess-22-871-2018

749 Grafton, R.Q., Ward, M.B., 2008. Prices versus rationing: Marshallian surplus and mandatory  
750 water restrictions. *Econ. Rec.* 84, 57–65. doi:10.1111/j.1475-4932.2008.00483.x

751 Groves, D.G., Yates, D., Tebaldi, C., 2008. Developing and applying uncertain global climate  
752 change projections for regional water management planning. *Water Resour. Res.* 44, 1–  
753 16. doi:10.1029/2008WR006964

754 Haylock, M.R., Peterson, T.C., Alves, L.M., Ambrizzi, T., Anuncia????o, Y.M.T., Baez, J.,  
755 Barros, V.R., Berlato, M.A., Bidegain, M., Coronel, G., Corradi, V., Garcia, V.J., Grimm,  
756 A.M., Karoly, D., Marengo, J.A., Marino, M.B., Moncunill, D.F., Nechet, D., Quintana,  
757 J., Rebello, E., Rusticucci, M., Santos, J.L., Trebejo, I., Vincent, L.A., 2006. Trends in  
758 total and extreme South American rainfall in 1960-2000 and links with sea surface  
759 temperature. *J. Clim.* 19, 1490–1512. doi:10.1175/JCLI3695.1

760 Hisdal, H., Tallaksen, L.M., Clausen, B., Peters, E., Gustard, A., 2004. Hydrological Drought  
761 Characteristics, in: Tallaksen, L.M., Van Lanen, H.A.J. (Eds.), *Developments in Water  
762 Science: Hydrological Drought, Processes and Estimation Methods for Streamflow and  
763 Groundwater.* Elsevier, Netherlands, pp. 139–198.

764 Honti, M., Scheidegger, A., Stamm, C., 2014. The importance of hydrological uncertainty  
765 assessment methods in climate change impact studies. *Hydrol. Earth Syst. Sci.* 18, 3301–  
766 3317. doi:10.5194/hess-18-3301-2014

767 Horita, F.E.A., de Albuquerque, J.P., Marchezini, V., Mendiondo, E.M., 2017. Bridging the  
768 gap between decision-making and emerging big data sources: An application of a model-

769 based framework to disaster management in Brazil. *Decis. Support Syst.* 97, 12–22.  
770 doi:10.1016/j.dss.2017.03.001

771 Hou, W., Chen, Z.Q., Zuo, D.D., Feng, G. lin, 2018. Drought loss assessment model for  
772 southwest China based on a hyperbolic tangent function. *Int. J. Disaster Risk Reduct.* 0–  
773 1. doi:10.1016/j.ijdr.2018.01.017

774 Howells, M., Hermann, S., Welsch, M., Bazilian, M., Segerström, R., Alfstad, T., Gielen, D.,  
775 Rogner, H., Fischer, G., Velthuis, H. Van, Wiberg, D., Young, C., Roehrl, R.A.,  
776 Mueller, A., Steduto, P., 2013. energy and water strategies. *Nat. Publ. Gr.* 3, 621–626.  
777 doi:10.1038/nclimate1789

778 Hund, S. V, Allen, D.M., Morillas, L., Johnson, M.S., 2018. Groundwater recharge indicator as  
779 tool for decision makers to increase socio-hydrological resilience to seasonal drought. *J.*  
780 *Hydrol.* (Adepted Manuscript). doi:10.1016/j.jhydrol.2018.05.069

781 IBGE, 2018. Estimativas de População | Estatísticas | IBGE :: Instituto Brasileiro de Geografia  
782 e Estatística. Sao Paulo.

783 Iglesias, E., Blanco, M., 2008. New directions in water resources management: The role of  
784 water pricing policies. *Water Resour. Res.* 44, 1–11. doi:10.1029/2006WR005708

785 Jobst, A.M., Kingston, D.G., Cullen, N.J., Schmid, J., 2018. Intercomparison of different  
786 uncertainty sources in hydrological climate change projections for an alpine catchment  
787 (upper Clutha River, New Zealand). *Hydrol. Earth Syst. Sci.* 22, 3125–3142.  
788 doi:10.5194/hess-22-3125-2018

789 Jones, R.N., 2000. Managing Uncertainty in Climate Change Projections – Issues for Impact  
790 Assessment. *Clim. Change* 45, 403–419. doi:10.1023/A:1005551626280

791 Kim, K.B., Kwon, H.H., Han, D., 2015. Bias correction methods for regional climate model  
792 simulations considering the distributional parametric uncertainty underlying the  
793 observations. *J. Hydrol.* 530, 568–579. doi:10.1016/j.jhydrol.2015.10.015

794 Krause, P., Boyle, D.P., 2005. Comparison of different efficiency criteria for hydrological  
795 model assessment. *Adv. Geosci.* 5, 89–97. doi:10.5194/adgeo-5-89-2005

796 Kumarasamy, K., Belmont, P., 2017. Multiple domain evaluation of watershed hydrology  
797 models. *Hydrol. Earth Syst. Sci. Discuss.* 1–32. doi:10.5194/hess-2017-121

798 Kunreuther, H., Heal, G., Allen, M., Edenhofer, O., Field, C.B., Yohe, G., 2013. Risk  
799 management and climate change. *Nat. Clim. Chang.* 3, 447–450.  
800 doi:10.1038/nclimate1740

801 Lei N° 9.433 do GOVERNO DO BRASIL, 1997. Lei N° 9.433, LEGISLAÇÃO CITADA  
802 ANEXADA PELA COORDENAÇÃO DE ESTUDOS LEGISLATIVOS - CEDI LEI N°

803 9.433, DE 8 DE JANEIRO DE 1997.

804 Liersch, S., Tecklenburg, J., Rust, H., Dobler, A., Fischer, M., Kruschke, T., Koch, H.,  
805 Hattermann, F., 2016. Are we using the right fuel to drive hydrological models? A climate  
806 impact study in the Upper Blue Nile. *Hydrol. Earth Syst. Sci. Discuss.* 1–34.  
807 doi:10.5194/hess-2016-422

808 Lloyd-hughes, B., 2013. The impracticality of a universal drought definition. *Theor. Appl.*  
809 *Climatol.* 117, 6007–611. doi:10.1007/s00704-013-1025-7

810 Logar, I., van den Bergh, J.C.J.M., 2013. Methods to Assess Costs of Drought Damages and  
811 Policies for Drought Mitigation and Adaptation: Review and Recommendations. *Water*  
812 *Resour. Manag.* 27, 1707–1720. doi:10.1007/s11269-012-0119-9

813 Lyra, A., Tavares, P., Chou, S.C., Sueiro, G., Dereczynski, C., Sondermann, M., Silva, A.,  
814 Marengo, J., 2017. Climate change projections over three metropolitan regions in  
815 Southeast Brazil using the non-hydrostatic Eta regional climate model at 5-km resolution.  
816 *Theor Appl Clim.* doi:10.1007/s00704-017-2067-z

817 Mansur, E.T., Olmstead, S.M., 2012. The value of scarce water : Measuring the inefficiency of  
818 municipal regulations. *J. Urban Econ.* 71, 332–346. doi:10.1016/j.jue.2011.11.003

819 Maraun, D., Widmann, M., 2018. Model Outputs Statistics, in: *Statistical Downscaling and*  
820 *Bias Correction for Climate Research.* Cambridge University Press, pp. 170–200.

821 Marengo, J., Nobre, C.A., Seluchi, M., Cuartas, A., Alves, L.M., Mendiando, E.M., Obregón,  
822 G., Sampaio, G., 2015. A seca e a crise hídrica de 2014-2015 em São Paulo. *Rev. USP*  
823 116, 31–44. doi:10.11606/issn.2316-9036.v0i106p31-44

824 Marengo, J.A., Ambrizzi, T., da Rocha, R.P., Alves, L.M., Cuadra, S. V., Valverde, M.C.,  
825 Torres, R.R., Santos, D.C., Ferraz, S.E.T., 2009a. Future change of climate in South  
826 America in the late twenty-first century: Intercomparison of scenarios from three regional  
827 climate models. *Clim. Dyn.* 35, 1089–1113. doi:10.1007/s00382-009-0721-6

828 Marengo, J.A., Jones, R., Alves, L.M., Vlaverde, M.C., 2009. Future change of temperature  
829 and precipitation extremes in South America as derived from the PRECIS regional climate  
830 modeling system. *Int. J. Climatol.* 4. doi:10.1002/joc.1863

831 Marengo, J.A., Rusticucci, M., Penalba, O., Renom, M., 2009b. An intercomparison of  
832 observed and simulated extreme rainfall and temperature events during the last half of the  
833 twentieth century: Part 2: Historical trends. *Clim. Change* 98, 509–529.  
834 doi:10.1007/s10584-009-9743-7

835 Mays, L.W., Tung, Y.-K., 2002. Economics for Hydrosystems, in: *Hydrosystems Engineering*  
836 *and Management.* McGraw-Hill, pp. 23–50.

837 Mechler, R., Pulido-velazquez, M., Koehler, M., Jenkins, K., Surminski, S., Williges, K.,  
838 Botzen, W., Cremades, R., Dransfeld, B., Hudson, P., Lopez-Nicolas, A., Lorant, A.,  
839 Manez, M., Michaelowa, A., 2017. Economic instruments, in: *Novel Multi-Sector*  
840 *Partnerships in Disaster Risk Management*. Posted at the Zurich Open Repository and  
841 Archive, University of Zurich, pp. 70–97.

842 Mehran, A., Mazdiyasn, O., Aghakouchak, A., 2015. A hybrid framework for assessing  
843 socioeconomic drought: Linking climate variability, local resilience, and demand. *J.*  
844 *Geophys. Researsearch Atmos.* 7520–7533. doi:10.1002/2015JD023147.Received

845 Mens, M.J.P., Gilroy, K., Williams, D., 2015. Developing system robustness analysis for  
846 drought risk management: an application on a water supply reservoir. *Nat. Hazards Earth*  
847 *Syst. Sci.* 15, 1933–1940. doi:10.5194/nhess-15-1933-2015

848 Mesquita, A.M., Ruiz, R.M., 2013. A financial economic model for urban water pricing in  
849 Brazil. *Urban Water J.* 9006, 85–96. doi:10.1080/1573062X.2012.699073

850 Meyer, V., Becker, N., Markantonis, V., Schwarze, R., Van Den Bergh, J.C.J.M., Bouwer,  
851 L.M., Bubeck, P., Ciavola, P., Genovese, E., Green, C., Hallegatte, S., Kreibich, H.,  
852 Lequeux, Q., Logar, I., Papyrakis, E., Pfuerscheller, C., Poussin, J., Przulski, V., Thielen,  
853 A.H., Viavattene, C., 2013. Review article: Assessing the costs of natural hazards-state of  
854 the art and knowledge gaps. *Nat. Hazards Earth Syst. Sci.* 13, 1351–1373.  
855 doi:10.5194/nhess-13-1351-2013

856 Millerd, F.W., 1984. The Role of Pricing in Managing the Demand for Water. *Can. Water*  
857 *Resour. J. / Rev. Can. des ressources hydriques* 9, 7–16. doi:10.4296/cwrj0903007

858 Mishra, A.K., Singh, V.P., 2010. A review of drought concepts. *J. Hydrol.* 391, 202–216.  
859 doi:10.1016/j.jhydrol.2010.07.012

860 Mohor, G.S., Mendiondo, E.M., 2017. Economic indicators of hydrologic drought insurance  
861 under water demand and climate change scenarios in a Brazilian context. *Ecol. Econ.* 140,  
862 66–78. doi:10.1016/j.ecolecon.2017.04.014

863 Molin, P.G., Tomas, F., Souza, D., Molin, P.G., Tomas, F., Souza, D., Sampaio, J.V.,  
864 Aparecida, A., 2015. Mapeamento de uso e cobertura do solo da bacia do rio Piracicaba ,  
865 SP : Anos 1990 , 2000 e 2010. Sao Paulo.

866 Moncur, J.E.T., 1987. Urban water pricing and drought management. *Water Resour. Res.* 23,  
867 393–398. doi:10.1029/WR023i003p00393

868 Montanari, A., 2007. What do we mean by ‘uncertainty’? The need for a consistent wording  
869 about uncertainty assessment in hydrology. *Hydrol. Process.* 21, 841–845.  
870 doi:10.1002/hyp



871 Montanari, A., Young, G., Savenije, H.H.G., Hughes, D., Wagener, T., Ren, L.L.,  
872 Koutsoyiannis, D., Cudennec, C., Toth, E., Grimaldi, S., Blöschl, G., Sivapalan, M.,  
873 Beven, K., Gupta, H., Hipsey, M., Schaeffli, B., Arheimer, B., Boegh, E., Schymanski, S.J.,  
874 Di Baldassarre, G., Yu, B., Hubert, P., Huang, Y., Schumann, A., Post, D.A., Srinivasan,  
875 V., Harman, C., Thompson, S., Rogger, M., Viglione, A., McMillan, H., Characklis, G.,  
876 Pang, Z., Belyaev, V., 2013. “Panta Rhei—Everything Flows”: Change in hydrology and  
877 society—The IAHS Scientific Decade 2013–2022. *Hydrol. Sci. J.* 58, 1256–1275.  
878 doi:10.1080/02626667.2013.809088

879 Moriasi, D.N., Arnold, J.G., Van Liew, M.W., Binger, R.L., Harmel, R.D., Veith, T.L., 2007.  
880 Model evaluation guidelines for systematic quantification of accuracy in watershed  
881 simulations. *Trans. ASABE* 50, 885–900. doi:10.13031/2013.23153

882 Mousavi, S.J., Anzab, N.R., 2017. Multi-Objective Optimization-Simulation for Reliability-  
883 Based Inter-Basin Water Allocation. *Water Resour. Manag.* doi:10.1007/s11269-017-  
884 1678-6

885 Muleta, M.K., 2012. Model Performance Sensitivity to Objective Function during Automated  
886 Calibrations. *J. Hydrol. Eng.* 17, 756–767. doi:10.1061/(ASCE)HE.1943-5584.0000497

887 Nam, W.-H., Hayes, M.J., Svoboda, M.D., Tadesse, T., Wilhite, D.A., 2015. Drought hazard  
888 assessment in the context of climate change for South Korea. *Agric. Water Manag.* 160,  
889 106–117. doi:10.1016/j.agwat.2015.06.029

890 Nobre, C.A., Marengo, J.A., 2016. Water crises and megacities in Brazil: Meteorological  
891 context of the São Paulo drought of 2014-2015 (No. Posted on October 17, 2016 in Climate  
892 Change, Environment, Urban Water, Water Security), Global Water Forum.

893 Nobre, C.A., Marengo, J.A., Seluchi, M.E., Cuartas, A., Alves, L.M., 2016. Some  
894 Characteristics and Impacts of the Drought and Water Crisis in Southeastern Brazil during  
895 2014 and 2015. *J. Water Resour. Prot.* 8, 252–262. doi:10.4236/jwarp.2016.82022

896 Nobre, C.A., Young, A.F., Marengo, J.A., Nobre, A.D., Ojima, R., 2011. Vulnerabilidades Das  
897 Megacidades Brasileiras Às Mudanças Climáticas : Região Metropolitana.

898 Nóbrega, M.T., Collischonn, W., Tucci, C.E.M., Paz, A.R., 2011. Uncertainty in climate change  
899 impacts on water resources in the Rio Grande Basin, Brazil. *Hydrol. Earth Syst. Sci.* 15,  
900 585–595. doi:10.5194/hess-15-585-2011

901 Nordin, C.F., Rosbjerg, D.M., 1970. APPLICATIONS OF CROSSING THEORY IN  
902 HYDROLOGY. *Int. Assoc. Sci. Hydrol.* 6024, 27–43. doi:10.1080/02626667009493929

903 PCJ/Comitês, 2016. Relatório da situação dos recursos hídricos 2016 UGRHI 05 - Bacias  
904 hidrográficas dos rios Piracicaba , Capivari e Jundiáí ano base – 2015.

905 PCJ/Comitês, 2006. Fundamentos da Cobrança pelo Uso dos Recursos Hídricos nas Bacias  
906 PCJ. Sao Paulo.

907 Prudhomme, C., Giuntoli, I., Robinson, E.L., Clark, D.B., Arnell, N.W., Dankers, R., Fekete,  
908 B.M., Franssen, W., Gerten, D., Gosling, S.N., Hagemann, S., Hannah, D.M., 2014.  
909 Hydrological droughts in the 21st century , hotspots and uncertainties from a global  
910 multimodel ensemble experiment. PNAS 111. doi:10.1073/pnas.1222473110

911 Psomas, A., Panagopoulos, Y., Konsta, D., Mimikou, M., 2016. Designing water efficiency  
912 measures in a catchment in Greece using WEAP and SWAT models. Procedia Eng. 162,  
913 269–276. doi:10.1016/j.proeng.2016.11.058

914 Purkey, D.R., Joyce, B., Vicuna, S., Hanemann, M.W., Dale, L.L., Yates, D., Dracup, J.A.,  
915 2008. Robust analysis of future climate change impacts on water for agriculture and other  
916 sectors: a case study in the Sacramento Valley. Clim. Chang. 87, 109–122.  
917 doi:10.1007/s10584-007-9375-8

918 Razmkhah, H., 2016. Preparing stream flow drought severity-duration-frequency curves using  
919 threshold level method. Arab. J. Geosci. 9, 1–10. doi:10.1007/s12517-016-2528-1

920 Refsgaard, J.C., van der Sluijs, J.P., Højberg, A.L., Vanrolleghem, P.A., 2007. Uncertainty in  
921 the environmental modelling process - A framework and guidance. Environ. Model.  
922 Softw. 22, 1543–1556. doi:10.1016/j.envsoft.2007.02.004

923 Rivera, J.A., Araneo, D.C., Penalba, O.C., 2017. Threshold level approach for streamflow  
924 drought analysis in the Central Andes of Argentina: a climatological assessment. Hydrol.  
925 Sci. J. 62, 1949–1964. doi:10.1080/02626667.2017.1367095

926 Rodrigues, D.B., Gupta, H. V, Mendiondo, E.M., Oliveira, P.T.S., 2015. Assessing  
927 uncertainties in surface water security: An empirical multimodel approach. Water Resour.  
928 Res. 51, 9127–9140. doi:10.1002/2014WR016259

929 Rossato, L., Marengo, J.A., Angelis, C.F. De, Bassi, L., Pires, M., 2017. Impact of soil moisture  
930 over Palmer Drought Severity Index and its future projections in Brazil. Brazilian J. Water  
931 Resour. 22.

932 Rossi, G., Cancelliere, A., 2013. Managing drought risk in water supply systems in Europe: A  
933 review. Int. J. Water Resour. Dev. 29, 272–289. doi:10.1080/07900627.2012.713848

934 Ruijs, A., Zimmermann, A., Berg, M. Van Den, Paulo, S., 2008. Demand and distributional  
935 effects of water pricing policies. Ecol. Econ. 6, 506–516.  
936 doi:10.1016/j.ecolecon.2007.10.015

937 SABESP, 2018a. Sabesp » Água » Mananciais » Boletim dos Mananciais [WWW Document].  
938 Bol. dos Mananciais. URL

939 <http://site.sabesp.com.br/site/interna/Default.aspx?secaoId=553> (accessed 5.31.18).

940 SABESP, 2018b. Regulamento do Sistema Tarifário da Sabesp [WWW Document]. Tarif.  
 941 Região Metrop. São Paulo.

942 SABESP, 2018c. Reajuste de Tarifas SABESP 2001-2018 [WWW Document]. Sabesp RI -  
 943 Relações com Investidores. URL  
 944 <http://www.sabesp.com.br/CalandraWeb/CalandraRedirect/?temp=4&proj=investidoresnovo&pub=T&db=&docid=9AA0FF2088FBF0A8832570DF006DE413&docidPai=AB82F8DBCD12AE488325768C0052105E&pai=filho10> (accessed 6.10.18).

947 SABESP, 2017a. Relatório da Administração 2017. Sao Paulo.

948 SABESP, 2017b. Sistema Cantareira [WWW Document]. Sist. Cantareira - Vis. Sist. Equiv.  
 949 URL <http://www2.ana.gov.br/Paginas/servicos/saladesituacao/v2/SistemaCantareira.aspx>  
 950 (accessed 12.31.16).

951 SABESP, 2016a. Comunicado - 02/16: Deliberação nº 641/2016 autorizando o cancelamento  
 952 do Programa de Incentivo à Redução do Consumo de Água. Governo Estadual, Sao Paulo.

953 SABESP, 2016b. COMUNICADO - 03/16: Marco Tarifario RMSP 2016. [WWW Document].  
 954 Comunitado 03/16 Tarif. Agua/Esgoto 2016. URL  
 955 [http://site.sabesp.com.br/site/uploads/file/clientes\\_servicos/comunicado\\_03\\_2016.pdf](http://site.sabesp.com.br/site/uploads/file/clientes_servicos/comunicado_03_2016.pdf)  
 956 (accessed 8.1.17).

957 SABESP, 2015. Crise Hídrica, Estratégia e Soluções da SABESP para a Região Metropolitana  
 958 de São Paulo. Sao Paulo.

959 SABESP, 1996. DECRETO Nº 41.446 de 16 Dezembro de 1996 (Regulamento do sistema  
 960 tarifário dos serviços prestados pela Companhia de Saneamento Básico do Estado de São  
 961 Paulo - SABESP).

962 SEADE, 2018. PIB Trimestral [WWW Document]. PIB Reg. 2017 (Portal Estatísticas do  
 963 Estado Sao Paulo). URL <http://www.seade.gov.br/produtos/pib-trimestral/> (accessed  
 964 5.1.18).

965 Şen, Z., 2015. Applied Drought Modeling , Prediction , and Mitigation. Elsevier.

966 Seong, C., Her, Y., Benham, B.L., 2015. Automatic Calibration Tool for Hydrologic Simulation  
 967 Program-FORTRAN Using a Shuffled Complex Evolution Algorithm. Water 503–527.  
 968 doi:10.3390/w7020503

969 Shi, P., Wang, J., Xu, W., Ye, T., Yang, S., Liu, L., Fang, W., Liu, K., Li, N., Wang, M., 2015.  
 970 World Atlas of Natural Disaster Risk. doi:10.1007/978-3-662-45430-5\_17

971 Skahill, B.E., Baggett, J.S., Frankenstein, S., Downer, C.W., 2009. Environmental Modelling  
 972 & Software More efficient PEST compatible model independent model calibration.

973 Environ. Model. Softw. 24, 517–529. doi:10.1016/j.envsoft.2008.09.011

974 Smakhtin, V.U., Schipper, E.L.F., 2008. Droughts: The impact of semantics and perceptions.

975 Water Policy 10, 131–143. doi:10.2166/wp.2008.036

976 Smitha, P.S., Narasimhan, B., Sudheer, K.P., Annamalai, H., 2018a. An improved bias

977 correction method of daily rainfall data using a sliding window technique for climate

978 change impact assessment. J. Hydrol. 556, 100–118. doi:10.1016/j.jhydrol.2017.11.010

979 Smitha, P.S., Narasimhan, B., Sudheer, K.P., Annamalai, H., 2018b. An improved bias

980 correction method of daily rainfall data using a sliding window technique for climate

981 change impact assessment. J. Hydrol. 556, 100–118. doi:10.1016/j.jhydrol.2017.11.010

982 Stahl, K., Kohn, I., Blauhut, V., Urquijo, J., De Stefano, L., Acacio, V., Dias, S., Stagege, J.H.,

983 Tallaksen, L.M., Kampragou, E., Van Loon, A.F., Barker, L.J., Melsen, L.A., Bifulco, C.,

984 Musolino, D., De Carli, A., Massarutto, A., Assimacopoulos, D., Van Lanen, H.A.J., 2016.

985 Impacts of European drought events: Insights from an international database of text-based

986 reports. Nat. Hazards Earth Syst. Sci. 16, 801–819. doi:10.5194/nhess-16-801-2016

987 Stedinger, J.R., Vogel, R.M., Foufoula-Georgio, E., 1993. Frequency Analysis of Extreme

988 Events, in: Maidment, D.R. (Ed.), Handbook of Hydrology. McGraw-Hill, New York, p.

989 1.

990 Stockholm Environment Institute (SEI), 2016. Tutorial Water Evaluation And Planning System

991 (WEAP).

992 Sung, J.H., Chung, E., 2014. Development of streamflow drought severity – duration –

993 frequency curves using the threshold level method. Hydrol. Earth Syst. Sci. 3341–3351.

994 doi:10.5194/hess-18-3341-2014

995 Sung, J.H., Chung, E.S., 2014. Development of streamflow drought severity-duration-

996 frequency curves using the threshold level method. Hydrol. Earth Syst. Sci. 18, 3341–

997 3351. doi:10.5194/hess-18-3341-2014

998 Svensson, C., Hannaford, J., Prosdociimi, I., 2016. Statistical distributions formonthly

999 aggregations of precipitation and streamflow in drought indicator applications, Water

1000 Resources Management. doi:10.1002/2016WR019276.Received

1001 Taffarello, D., Samproгна Mohor, G., do Carmo Calijuri, M., Mendiondo, E.M., 2016. Field

1002 investigations of the 2013–14 drought through quali-quantitative freshwater monitoring at

1003 the headwaters of the Cantareira System, Brazil. Water Int. 8060, 1–25.

1004 doi:10.1080/02508060.2016.1188352

1005 Taffarello, D., Srinivasan, R., Mohor, G.S., B, J.L., Mendiondo, E.M., 2018. Modelling

1006 freshwater quality scenarios with ecosystem-based adaptation in the headwaters of the

1007 Cantareira System, Brazil. *Hydrol. Earth Syst. Sci.* (In Press).

1008 Todisco, F., Mannocchi, F., Vergni, L., 2013. Severity – duration – frequency curves in the  
1009 mitigation of drought impact: an agricultural case study. *Nat. Hazards* 1863–1881.  
1010 doi:10.1007/s11069-012-0446-4

1011 Tosunoglu, F., Kisi, O., 2016. Joint modelling of annual maximum drought severity and  
1012 corresponding duration. *J. Hydrol.* 543, 406–422. doi:10.1016/j.jhydrol.2016.10.018

1013 Touma, D., Ashfaq, M., Nayak, M.A., Kao, S., Diffenbaugh, N.S., 2015. A multi-model and  
1014 multi-index evaluation of drought characteristics in the 21st century. *J. Hydrol.* 526, 196–  
1015 207. doi:10.1016/j.jhydrol.2014.12.011

1016 Tung, Y., Yen, B.-C., Melching, C., 2006. *Hydrosystems Engineering Reliability Assessment  
1017 and Risk Analysis*, 1 ed. ed. McGraw-Hill. doi:DOI: 10.1036/0071451587

1018 Van Lanen, H.A.J., Laaha, G., Kingston, D.G., Gauster, T., Ionita, M., Vidal, J.P., Vlnas, R.,  
1019 Tallaksen, L.M., Stahl, K., Hannaford, J., Delus, C., Fendekova, M., Mediero, L.,  
1020 Prudhomme, C., Rets, E., Romanowicz, R.J., Gailliez, S., Wong, W.K., Adler, M.J.,  
1021 Blauhut, V., Caillouet, L., Chelcea, S., Frolova, N., Gudmundsson, L., Hanel, M.,  
1022 Haslinger, K., Kireeva, M., Osuch, M., Sauquet, E., Stagge, J.H., Van Loon, A.F., 2016.  
1023 Hydrology needed to manage droughts: the 2015 European case. *Hydrol. Process.* 30,  
1024 3097–3104. doi:10.1002/hyp.10838

1025 Van Lanen, H.A.J., Wanders, N., Tallaksen, L.M., Van Loon, A.F., Van Lanen, C.H.A.J., 2013.  
1026 Hydrological drought across the world: impact of climate and physical catchment  
1027 structure. *Hydrol. Earth Syst. Sci.* 1715–1732. doi:10.5194/hess-17-1715-2013

1028 Van Loon, A.F., 2015. Hydrological drought explained. *Wiley Interdiscip. Rev. Water* 2, 359–  
1029 392. doi:10.1002/wat2.1085

1030 Van Loon, A.F., Gleeson, T., Clark, J., Van Dijk, A.I.J.M., Stahl, K., Hannaford, J., Di  
1031 Baldassarre, G., Teuling, A.J., Tallaksen, L.M., Uijlenhoet, R., Hannah, D.M., Sheffield,  
1032 J., Svoboda, M., Verbeiren, B., Wagener, T., Rangelcroft, S., Wanders, N., Van Lanen,  
1033 H.A.J., 2016a. Drought in the Anthropocene. *Nat. Geosci.* 9, 89–91.  
1034 doi:10.1038/ngeo2646

1035 Van Loon, A.F., Stahl, K., Di Baldassarre, G., Clark, J., Rangelcroft, S., Wanders, N., Gleeson,  
1036 T., Van Dijk, A.I.J.M., Tallaksen, L.M., Hannaford, J., Uijlenhoet, R., Teuling, A.J.,  
1037 Hannah, D.M., Sheffield, J., Svoboda, M., Verbeiren, B., Wagener, T., Van Lanen, H.A.J.,  
1038 2016b. Drought in a human-modified world: Reframing drought definitions,  
1039 understanding, and analysis approaches. *Hydrol. Earth Syst. Sci.* 20, 3631–3650.  
1040 doi:10.5194/hess-20-3631-2016

1041 Vicuna, S., Dracup, J.A., 2007. The evolution of climate change impact studies on hydrology  
1042 and water resources in California. *Clim. Change* 82, 327–350. doi:10.1007/s10584-006-  
1043 9207-2

1044 Vicuña, S., Garreaud, R.D., Mcphee, J., 2011. Climate change impacts on the hydrology of a  
1045 snowmelt driven basin in semiarid Chile. *Clim. Chang.* 105, 469–488.  
1046 doi:10.1007/s10584-010-9888-4

1047 Wada, Y., van Beek, L.P.H., Wanders, N., Bierkens, M.F.P., 2013. Human water consumption  
1048 intensifies hydrological drought worldwide. *Environ. Res. Lett.* 8, 034036.  
1049 doi:10.1088/1748-9326/8/3/034036

1050 Wanders, N., Van Loon, A.F., Van Lanen, H.A.J., 2017. Frequently used drought indices reflect  
1051 different drought conditions on global scale. *Hydrol. Earth Syst. Sci.* 1–16.

1052 Wanders, N., Wada, Y., 2015. Human and climate impacts on the 21st century hydrological  
1053 drought. *J. Hydrol.* 526, 208–220. doi:10.1016/j.jhydrol.2014.10.047

1054 Watts, G., Christierson, B. von, Hannaford, J., Lonsdale, K., 2012. Testing the resilience of  
1055 water supply systems to long droughts. *J. Hydrol.* 414–415, 255–267.  
1056 doi:10.1016/j.jhydrol.2011.10.038

1057 Wilby, R.L., Harris, I., 2006. A framework for assessing uncertainties in climate change  
1058 impacts: Low-flow scenarios for the River Thames, UK. *Water Resour. Res.* 42, 1–10.  
1059 doi:10.1029/2005WR004065

1060 World Bank, 2017. Lesotho WEAP Manual. World Bank Washington, DC License: Creative  
1061 Commons Attribution CC BY 3.0 IGO. doi:10.1596/26026

1062 Yates, D., Purkey, D., Sieber, J., Huber-Lee, A., Galbraith, H., 2005a. WEAP21—A Demand-  
1063 , Priority-, and Preference-Driven Water Planning Model Part 1: Model Characterisitics.  
1064 *Water Int.* 30, 501–512. doi:10.1080/02508060508691894

1065 Yates, D., Purkey, D., Sieber, J., Huber-lee, A., Galbraith, H., Yates, D., Iwra, M., Institute-  
1066 boston, S.E., 2005b. WEAP21 – A Demand- , Priority- , and Preference-Driven Water  
1067 Planning Model Part 2 : Aiding Freshwater Ecosystem Service Evaluation. *Water Int.* 30,  
1068 37–41. doi:10.1080/02508060508691894

1069 Zaidman, M.D., Keller, V., Young, A.R., Cadman, D., 2003. Flow-duration-frequency  
1070 behaviour of British rivers based on annual minima data. *J. Hydrol.* 277, 195–213.  
1071 doi:10.1016/S0022-1694(03)00089-1

1072 Zeff, H.B., Characklis, G.W., 2013. Managing water utility financial risks through third-party  
1073 index insurance contracts. *Water Resour. Res.* 49, 4939–4951. doi:10.1002/wrcr.20364

1074 Zuffo, A.C., 2015. Aprendizados das crises da água: O que faremos com eles? [Lessons learnt

1075 from water crises: What can we do about them?] [WWW Document]. Apresentação em  
1076 Mesa Redon. no XXI Simp. Bras. Recur. Hídricos. Brasília 22-27. URL  
1077 <http://eventos.abrh.org.br/xxisbrh/programacao-mr.php> (accessed 8.1.17).  
1078

## 1 **Complementary Material.**

### 2 **A. Appendix.**

3 The performance criteria described below have been used in this study to test how well the  
4 calibrated model fits the observed data. These evaluation statistics have been selected based on  
5 recommendations in the literature (Moriassi et al., 2007; Muleta, 2012).

6

#### 7 **Nash-Sutcliffe Efficiency (NSE)**

$$8 \quad NSE = 1 - \frac{\sum_{i=1}^N (S_i - O_i)^2}{\sum_{i=1}^N (S_i - O_{mean})^2} \quad \text{Equation A-1.}$$

9 Where, “ $S_i$ ” is the model simulated output and “ $O_i$ ” observed hydrologic variable.

10

#### 11 **Volumetric Efficiency (VE)**

$$12 \quad VE = 1 - \frac{\sum_{i=1}^N |S_i - O_i|}{\sum_{i=1}^N O_i} \quad \text{Equation A-2.}$$

#### 13 **Ratio of Standard Deviation of Observations to RMS (RSR)**

$$14 \quad RSR = \frac{\sqrt{\sum_{i=1}^N (S_i - O_i)^2}}{\sqrt{\sum_{i=1}^N (S_i - O_{mean})^2}} \quad \text{Equation A-3.}$$

#### 15 **Percent bias (PBIAS)**

$$16 \quad PBIAS = \frac{\sum_{i=1}^N (O_i - S_i)}{\sum_{i=1}^N O_i} \cdot 100 \quad \text{Equation A-4.}$$

#### 17 **Coefficient of Determination ( $R^2$ )**

$$18 \quad R^2 = \left( \frac{\sum_{i=1}^N [O_i - O_{mean}] \cdot [S_i - S_{mean}]}{\{\sum_{i=1}^N [O_i - O_{mean}]^2\}^{0.5} \cdot \{\sum_{i=1}^N [S_i - S_{mean}]^2\}^{0.5}} \right)^2 \quad \text{Equation A-5.}$$

19

20 Cantareira basins performance criteria for Calibration and Validation periods. \*Cal. =  
21 Calibration period and Val. = Validation period, are shown in the Table A-1. The classification  
22 of colors are as follows: green for “very good” ( $NSE > 0.75$ ;  $PBIAS < \pm 10\%$ ;  $RSR < 0.50$ ),  
23 yellow for “good or satisfactory” ( $0.75 > NSE > 0.5$ ;  $\pm 10\% < PBIAS < \pm 25\%$ ;  $0.50 < RSR <$   
24  $0.60$ ), red for “unsatisfactory” ( $NSE < 0.5$ ;  $PBIAS > \pm 25\%$ ;  $RSR > 0.70$ ). Moreover, the



25 correlation coefficient ( $R^2$ ) and the VE criterion values close to 1.0 mean that the prediction  
 26 dispersion is equal to that of the observation.

27 **Table A-1.** Performance criteria results on the Cantareira modeled basins.

| Watersheds | Area<br>(km <sup>2</sup> ) | VE   |      | NSE  |      | RSR  |      | PBIAS (%) |       | NSE <sub>Log</sub> |      | R <sup>2</sup> |      |
|------------|----------------------------|------|------|------|------|------|------|-----------|-------|--------------------|------|----------------|------|
|            |                            | Cal. | Val. | Cal. | Val. | Cal. | Val. | Cal.      | Val.  | Cal.               | Val. | Cal.           | Val. |
| Sub B-F28  | 269.0                      | 0.79 | 0.72 | 0.74 | 0.52 | 0.49 | 0.57 | 1.64      | 4.89  | 0.69               | 0.69 | 0.74           | 0.53 |
| Sub B-F23  | 508.4                      | 0.83 | 0.8  | 0.87 | 0.86 | 0.38 | 0.38 | 9.52      | 5.58  | 0.78               | 0.85 | 0.9            | 0.88 |
| Sub B-F25  | 179.5                      | 0.87 | 0.77 | 0.93 | 0.84 | 0.27 | 0.42 | 5.45      | -9.54 | 0.91               | 0.78 | 0.94           | 0.86 |
| Jaguari    | 67.8                       | 0.88 | 0.72 | 0.93 | 0.84 | 0.27 | 0.48 | -3.3      | -21.1 | 0.89               | 0.61 | 0.93           | 0.9  |

28

| Watersheds | Area<br>(km <sup>2</sup> ) | VE   |      | NSE  |      | RSR  |      | PBIAS (%) |       | NSE <sub>Log</sub> |      | R <sup>2</sup> |      |
|------------|----------------------------|------|------|------|------|------|------|-----------|-------|--------------------|------|----------------|------|
|            |                            | Cal. | Val. | Cal. | Val. | Cal. | Val. | Cal.      | Val.  | Cal.               | Val. | Cal.           | Val. |
| Jacareí    | 201.0                      | 0.8  | 0.75 | 0.71 | 0.87 | 0.44 | 0.42 | 2.08      | -1.54 | 0.49               | 0.75 | 0.79           | 0.87 |

29

| Watersheds | Area<br>(km <sup>2</sup> ) | VE   |      | NSE  |      | RSR  |      | PBIAS (%) |       | NSE <sub>Log</sub> |      | R <sup>2</sup> |      |
|------------|----------------------------|------|------|------|------|------|------|-----------|-------|--------------------|------|----------------|------|
|            |                            | Cal. | Val. | Cal. | Val. | Cal. | Val. | Cal.      | Val.  | Cal.               | Val. | Cal.           | Val. |
| Sub B-F24  | 172.8                      | 0.83 | 0.78 | 0.85 | 0.76 | 0.41 | 0.47 | -9.91     | 10.5  | 0.83               | 0.79 | 0.89           | 0.82 |
| Sub B-F30  | 119.7                      | 0.92 | 0.85 | 0.85 | 0.73 | 0.36 | 0.5  | 1.54      | 2.56  | 0.84               | 0.79 | 0.86           | 0.73 |
| Cachoeira  | 97.1                       | 0.71 | 0.70 | 0.78 | 0.81 | 0.5  | 0.53 | -20.3     | -13.5 | 0.58               | 0.53 | 0.87           | 0.85 |

30

| Watersheds | Area<br>(km <sup>2</sup> ) | VE   |      | NSE  |      | RSR  |      | PBIAS (%) |       | NSE <sub>Log</sub> |      | R <sup>2</sup> |      |
|------------|----------------------------|------|------|------|------|------|------|-----------|-------|--------------------|------|----------------|------|
|            |                            | Cal. | Val. | Cal. | Val. | Cal. | Val. | Cal.      | Val.  | Cal.               | Val. | Cal.           | Val. |
| Sub B-F34  | 135.5                      | 0.85 | 0.84 | 0.53 | 0.35 | 0.7  | 0.68 | 14.6      | 2.59  | 0.42               | 0.38 | 0.84           | 0.69 |
| Atibainha  | 176.2                      | 0.80 | 0.72 | 0.75 | 0.74 | 0.44 | 0.53 | 9.41      | -12.2 | 0.77               | 0.66 | 0.83           | 0.85 |

31

| Watersheds | Area<br>(km <sup>2</sup> ) | VE   |      | NSE  |      | RSR  |      | PBIAS (%) |      | NSE <sub>Log</sub> |      | R <sup>2</sup> |      |
|------------|----------------------------|------|------|------|------|------|------|-----------|------|--------------------|------|----------------|------|
|            |                            | Cal. | Val. | Cal. | Val. | Cal. | Val. | Val.      | Val. | Cal.               | Val. | Cal.           | Val. |
| P. Castro  | 333.7                      | 0.81 | 0.78 | 0.73 | 0.72 | 0.58 | 0.53 | -2.81     | 8.54 | 0.67               | 0.63 | 0.9            | 0.74 |

32

33

34

35

36

37

38

39

40 **B. Appendix**

41 Fig. 3.5-1 shows that in the future there is no clear trend in the average discharge, since in some  
42 periods the curve exhibits an increase and in other periods a decrease. In addition, the average  
43 discharge per time period showed higher values during the 2041-2070 scenarios. On the other  
44 hand, the average discharge per model showed higher values in the Eta/HadGEM model results  
45 compared to the Eta/MIROC5 model.

46

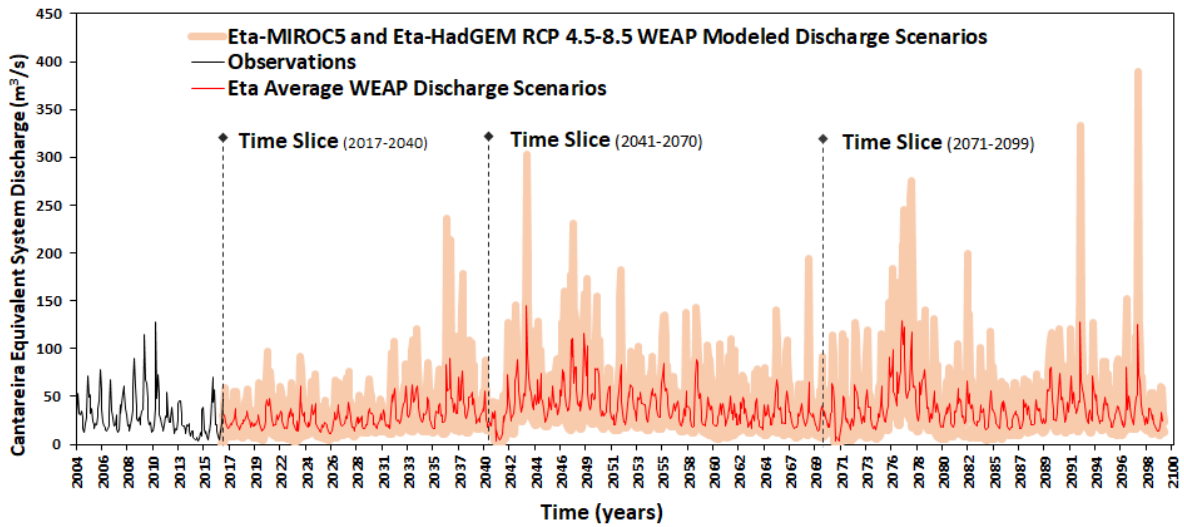

47

48 **Figure B-1.** Discharge projection scenarios modeled in WEAP, driven by RCM Eta-MIROC5 and Eta-HadGEM  
49 under RCP 4.5 - 8.5 scenarios.

50 **C. Appendix.**

51 Fit diagnostic plot of Generalized Extreme Value (GEV) distribution.

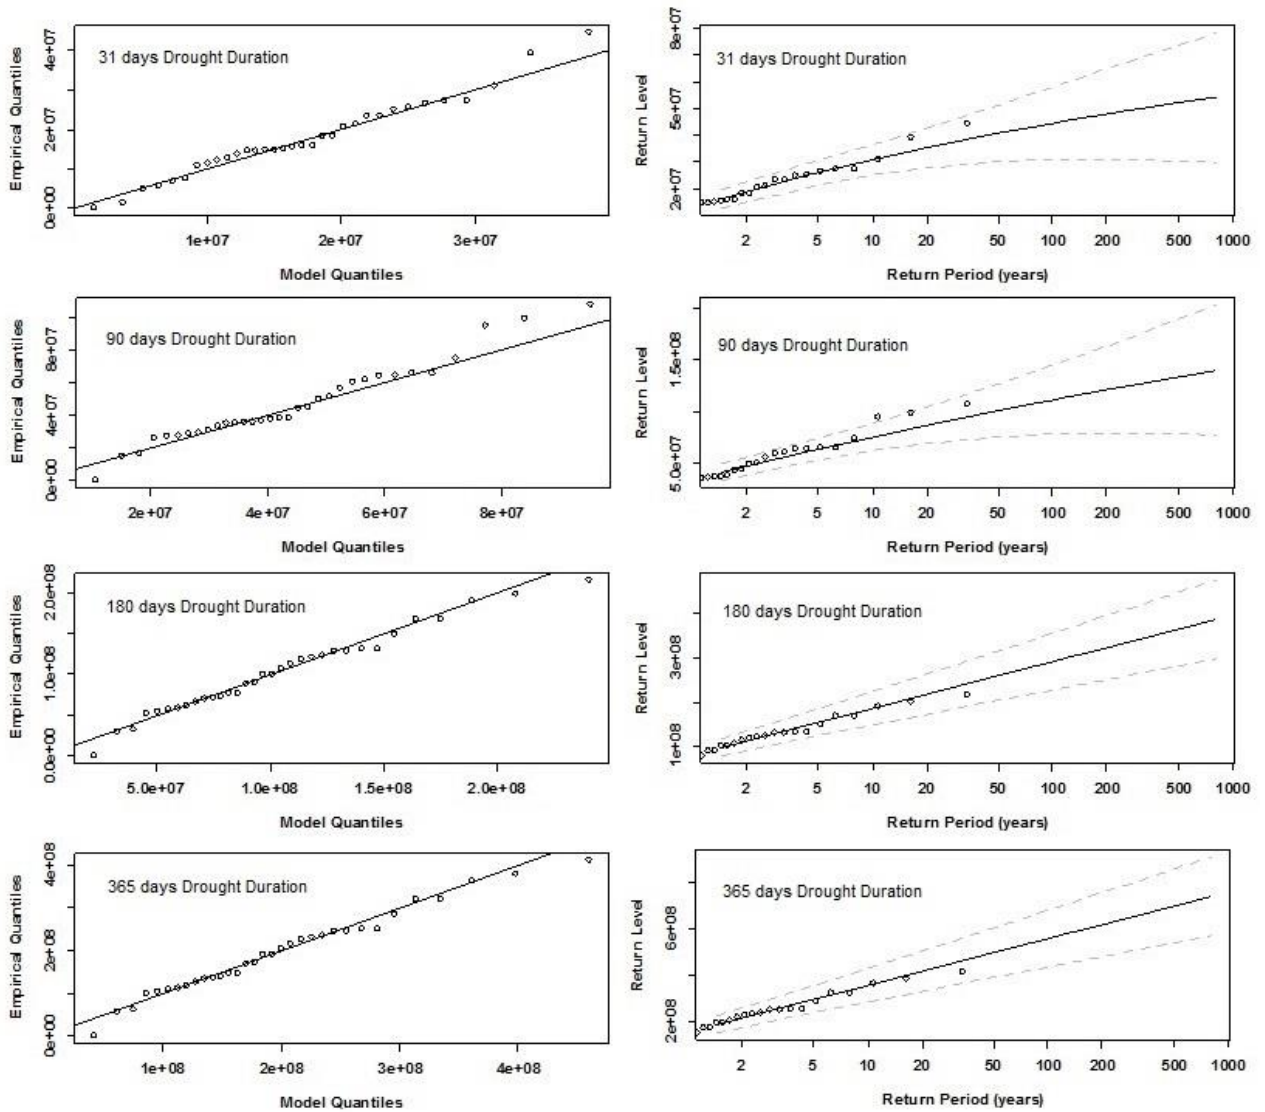

52

53 **Figure C-1.** Diagnostic plots for stationary GEV model under historical Eta-HadGEM scenario and stationarity  
54 demand (monthly drought duration intervals): Left panel QQ-plot in [m<sup>3</sup>]; Right panel, return level [m<sup>3</sup>] vs return  
55 period plot.

56

57

58

59

60

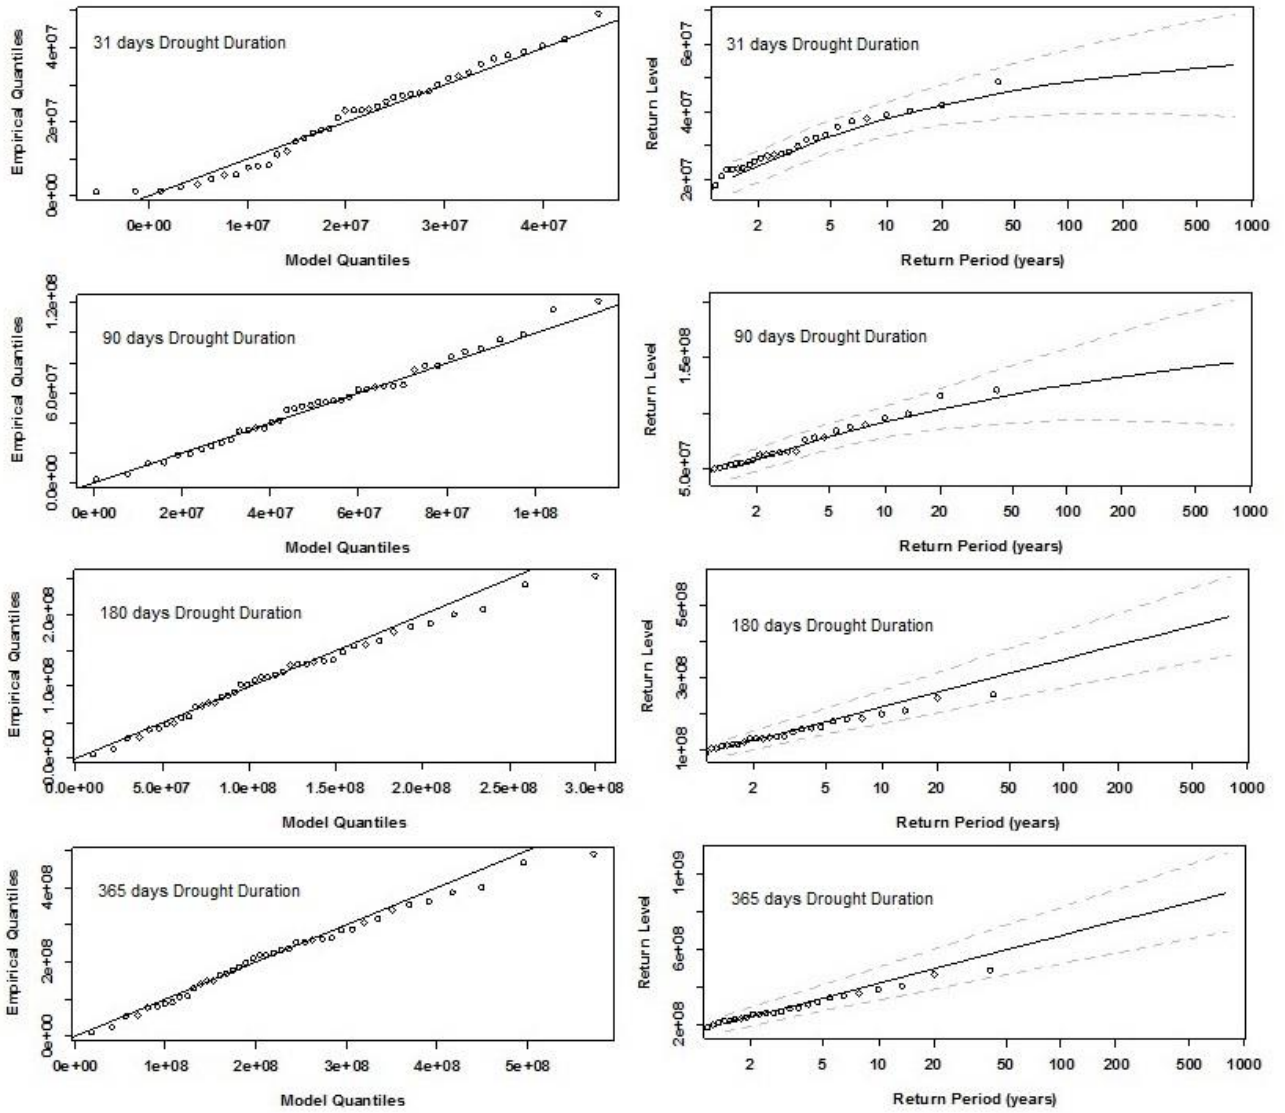

61

62 **Figure C-2.** Diagnostic plots for stationary GEV model under historical Eta-HadGEM scenario and non-  
 63 stationarity demand (monthly drought duration intervals): Left panel QQ-plot [m<sup>3</sup>]; Right panel [m<sup>3</sup>], return level  
 64 vs return period plot.

65

66

67

68

69

70

71

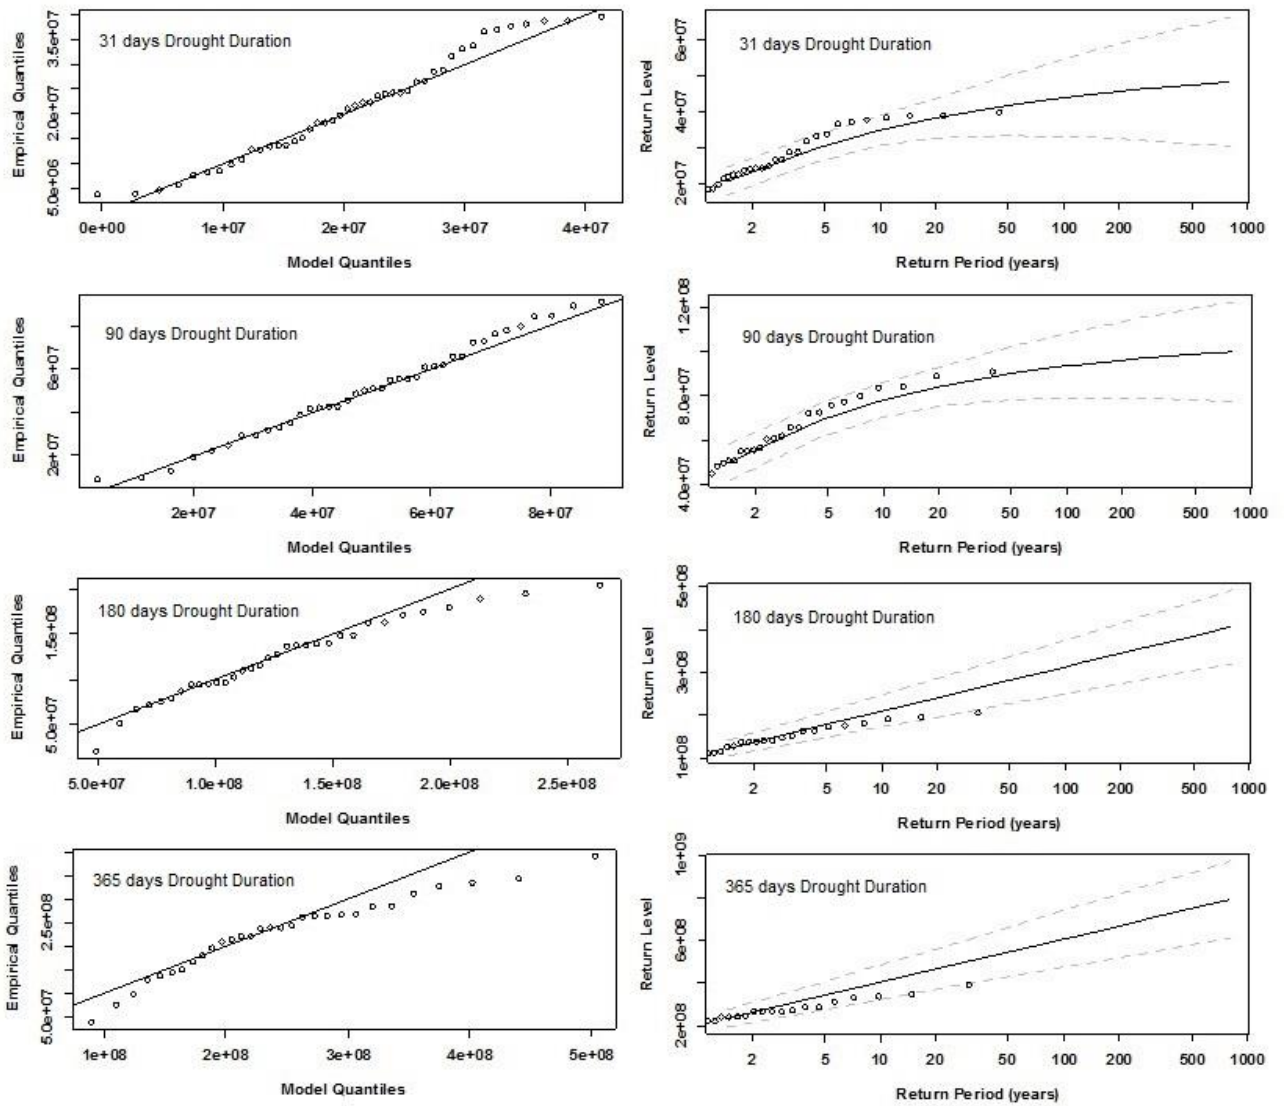

72

73 **Figure C-3.** Diagnostic plots for stationary GEV model under historical Eta-MIROC5 scenario and stationarity  
 74 demand (monthly drought duration intervals): Left panel QQ-plot [m<sup>3</sup>]; Right panel, return level [m<sup>3</sup>] vs return  
 75 period plot.

76

77

78

79

80

81

82

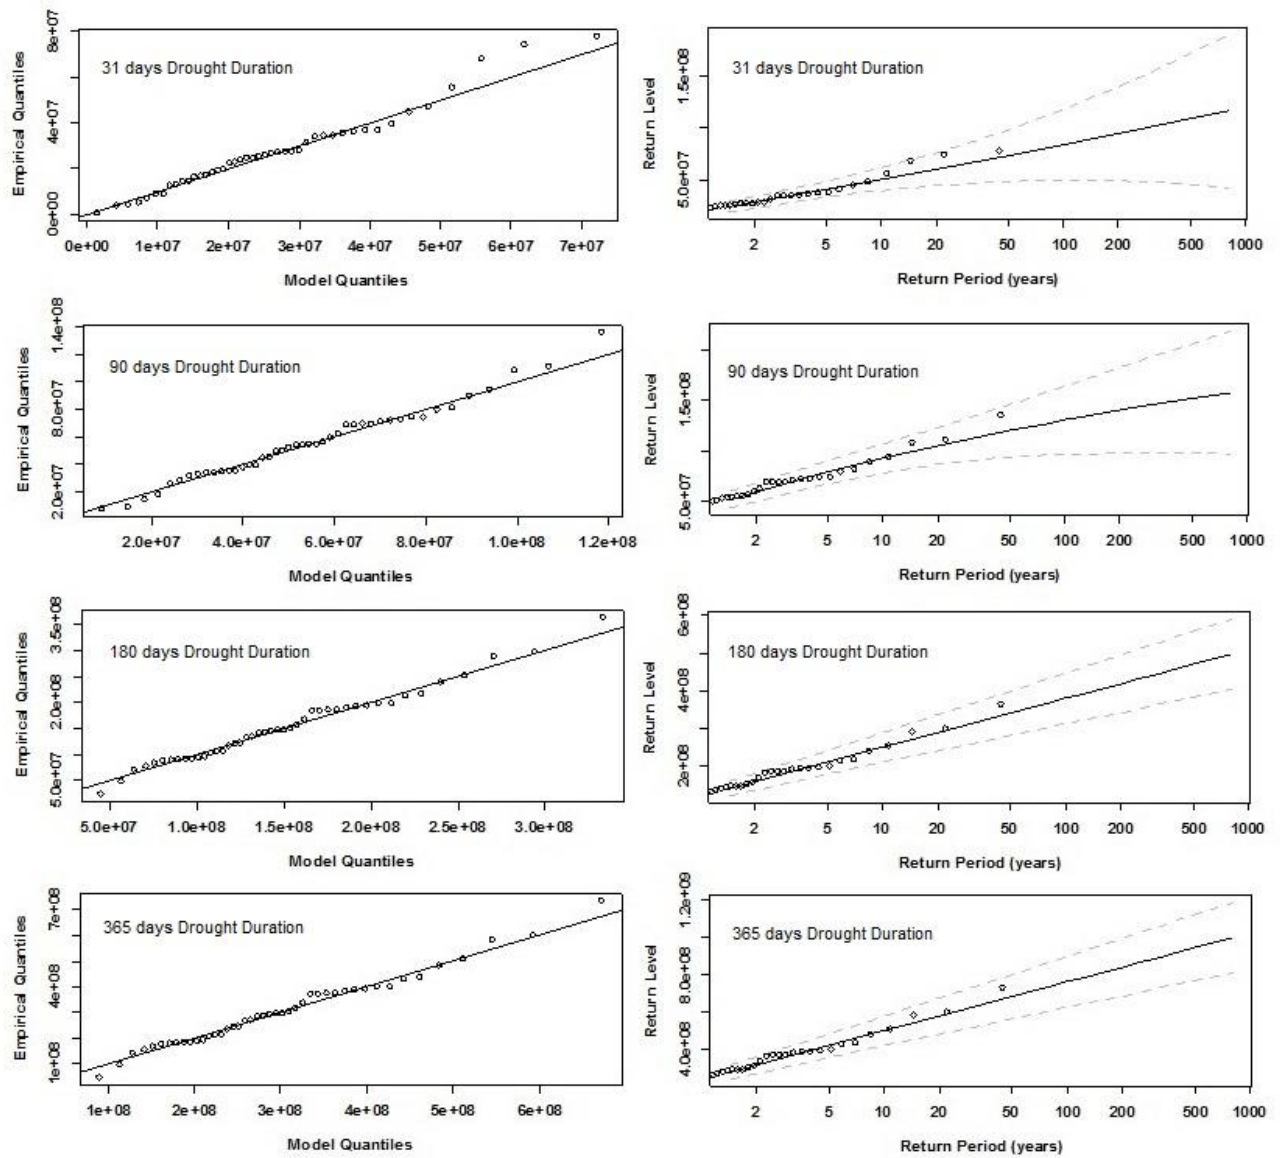

83

84 **Figure C-4.** Diagnostic plots for stationary GEV model under historical Eta-MIROC5 scenario and non-  
 85 stationarity demand (monthly drought duration intervals): Left panel QQ-plot [m<sup>3</sup>]; Right panel, return level [m<sup>3</sup>]  
 86 vs return period plot.

87

88

89

90

91

92

93

94 **D. Appendix.**

95

96 **Table D-1.** Adjusted parameters GEV distribution Adjusted for SDF curve under Eta-MIROC5. Hist.-Stationary  
97 Demand scenario.

| Drought Duration | EtaMIROC5 Hist. Stationary Demand |                    |                 | Negative Log-Likelihood |
|------------------|-----------------------------------|--------------------|-----------------|-------------------------|
|                  | Location ( $\mu$ )                | Scale ( $\sigma$ ) | Shape ( $\xi$ ) |                         |
| 31 days          | 1.69E+07                          | 1.06E+07           | -2.88E-01       | 773.50                  |
| 90 days          | 4.25E+07                          | 2.29E+07           | -3.67E-01       | 714.02                  |
| 180 days         | 1.06E+08                          | 4.48E+07           | 0.00E+00        | 629.90                  |
| 365 days         | 2.00E+08                          | 8.86E+07           | 0.00E+00        | 592.68                  |

98

99 **Table D-2.** Adjusted parameters GEV distribution Adjusted for SDF curve under Eta-MIROC5. Hist.-Non-  
100 Stationary Demand scenario.

| Drought Duration | EtaMIROC5 Hist. Non-Stationary Demand |                    |                 | Negative Log-Likelihood |
|------------------|---------------------------------------|--------------------|-----------------|-------------------------|
|                  | Location ( $\mu$ )                    | Scale ( $\sigma$ ) | Shape ( $\xi$ ) |                         |
| 31 days          | 1.90E+07                              | 1.33E+07           | 2.74E-02        | 791.25                  |
| 90 days          | 4.36E+07                              | 2.40E+07           | -1.07E-01       | 813.71                  |
| 180 days         | 1.20E+08                              | 5.62E+07           | 0.00E+00        | 853.50                  |
| 365 days         | 2.42E+08                              | 1.13E+08           | 0.00E+00        | 884.40                  |

101

102 **Table D-3.** Adjusted parameters GEV distribution Adjusted for SDF curve under Eta-HadGEM. Hist.-Stationary  
103 Demand scenario.

| Drought Duration | EtaHADGEM-ES Hist. Stationary Demand |                    |                 | Negative Log-Likelihood |
|------------------|--------------------------------------|--------------------|-----------------|-------------------------|
|                  | Location ( $\mu$ )                   | Scale ( $\sigma$ ) | Shape ( $\xi$ ) |                         |
| 31 days          | 1.33E+07                             | 8.64E+06           | -1.10E-01       | 576.79                  |
| 90 days          | 3.53E+07                             | 1.88E+07           | -5.54E-02       | 605.61                  |
| 180 days         | 8.00E+07                             | 4.56E+07           | 0.00E+00        | 631.75                  |
| 365 days         | 1.53E+08                             | 8.73E+07           | 0.00E+00        | 653.16                  |

104

105 **Table D-4.** Adjusted parameters GEV distribution Adjusted for SDF curve under Eta-HadGEM. Hist.-Non-  
106 Stationary Demand scenario.

| Drought Duration | EtaHADGEM-ES Hist. Non-Stationary Demand |                    |                 | Negative Log-Likelihood |
|------------------|------------------------------------------|--------------------|-----------------|-------------------------|
|                  | Location ( $\mu$ )                       | Scale ( $\sigma$ ) | Shape ( $\xi$ ) |                         |
| 31 days          | 1.62E+07                                 | 1.32E+07           | -3.04E-01       | 728.85                  |
| 90 days          | 4.13E+07                                 | 2.71E+07           | -1.84E-01       | 761.14                  |
| 180 days         | 8.63E+07                                 | 5.73E+07           | 0.00E+00        | 792.70                  |
| 365 days         | 1.65E+08                                 | 1.10E+08           | 0.00E+00        | 819.49                  |

107

108

109

110 **E. Appendix**

111 Histogram for the SABESP tariff adjustment data series during the period 2000-2016 (Figure  
 112 E-1) and Cantareira System Drought-Cost-Robustness curve (Figure E-2).

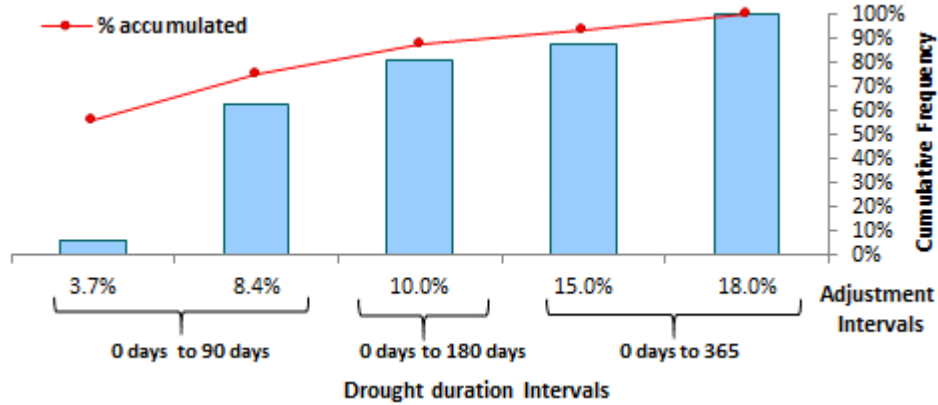

113

114 **Figure E-1.** Relationship assumptions between Drought duration intervals and water tariff adjustments. Series  
 115 structure: 16 data in total; first interval 1 frequency, second interval 9 frequencies, third interval 3 frequencies,  
 116 fourth interval 1 frequency and fifth interval 2 frequencies; average 7.85%, minimum 3.7% and maximum 18.9%.

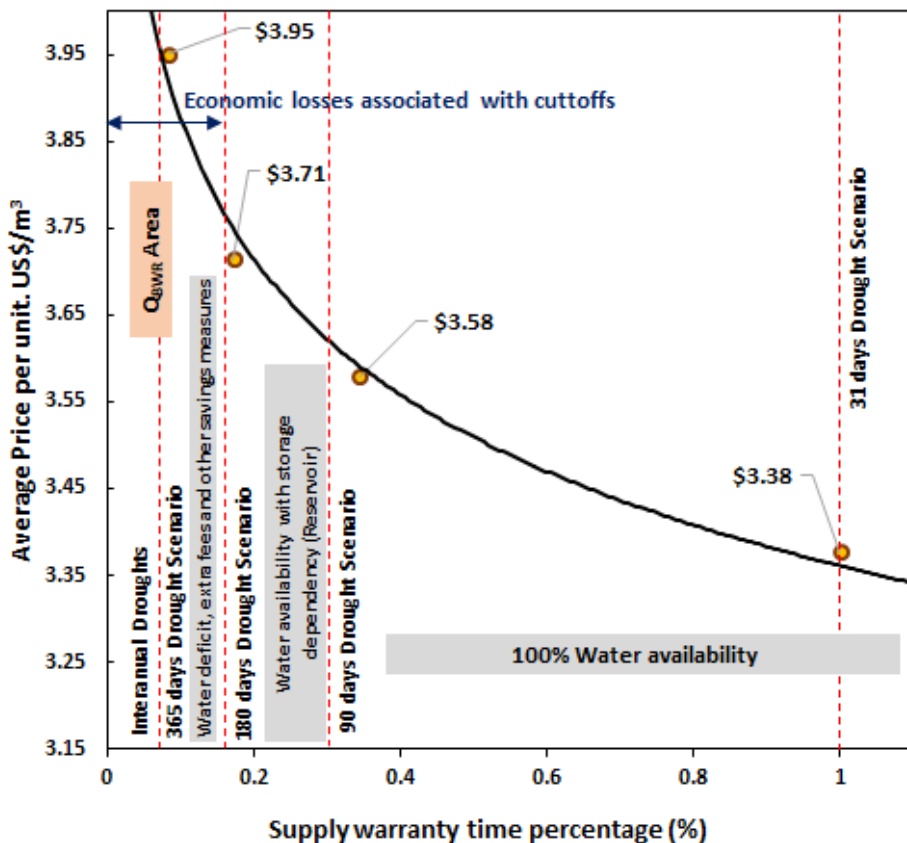

117

118 **Figure E-2.** Cantareira System Drought-Cost-Robustness curve, based on the water price and drought duration.  
 119 The supply warranty time is a defined index for the construction of the drought impact curve. In this case, the  
 120 drought impact curve describe the relationship between the duration of the drought (supply guarantee time), the  
 121 water price adjustment rate and the system robustness. Supply warranty time is the ration between 100% Supply  
 122 warranty time during 31 days and the Analysis Scenario of Supply warranty time (days). For example, 31  
 123 days/31days=1; 31days/90days=0.34; and 31days/180days=0.17 and 31 days/365 days=0.084.
